# Supplementary material
Source: Royal Society of Chemistry journal article supplement (doi:10.1039/d6nj00459h)
Supplement: d6nj00459h1.pdf [file d6nj00459h1.pdf]

**Table S1.** Experimental parameters and refinement details for the structures of **Nd**, **Ho**, **Tm** at 100 and 300K.

| Identification code                         | Nd_100K                                                             | Nd_300K                                                            | Ho_100K                                                             |
|---------------------------------------------|---------------------------------------------------------------------|--------------------------------------------------------------------|---------------------------------------------------------------------|
| Deposition number (CCDC)                    | 2528619                                                             | 2528623                                                            | 2528620                                                             |
| Empirical formula                           | C <sub>27</sub> H <sub>29</sub> N <sub>2</sub> NdO <sub>6</sub>     | C <sub>27</sub> H <sub>29</sub> N <sub>2</sub> NdO <sub>6</sub>    | C <sub>27</sub> H <sub>29</sub> HoN <sub>2</sub> O <sub>6</sub>     |
| Formula weight                              | 621.76                                                              | 621.76                                                             | 642.45                                                              |
| Temperature/K                               | 100(2)                                                              | 300(2)                                                             | 100(2)                                                              |
| Crystal system                              | monoclinic                                                          | monoclinic                                                         | monoclinic                                                          |
| Space group                                 | P2 <sub>1</sub> /n                                                  | P2 <sub>1</sub> /n                                                 | P2 <sub>1</sub> /n                                                  |
| a/Å                                         | 9.4200(9)                                                           | 9.520(5)                                                           | 9.4176(7)                                                           |
| b/Å                                         | 20.973(2)                                                           | 21.161(11)                                                         | 20.7896(10)                                                         |
| c/Å                                         | 14.6628(14)                                                         | 14.926(7)                                                          | 14.4163(11)                                                         |
| α/°                                         | 90                                                                  | 90                                                                 | 90                                                                  |
| β/°                                         | 98.810(3)                                                           | 99.216(16)                                                         | 98.198(3)                                                           |
| γ/°                                         | 90                                                                  | 90                                                                 | 90                                                                  |
| Volume/Å <sup>3</sup>                       | 2862.8(5)                                                           | 2968(3)                                                            | 2793.7(3)                                                           |
| Z                                           | 4                                                                   | 4                                                                  | 4                                                                   |
| ρ <sub>calc</sub> /g/cm <sup>3</sup>        | 1.443                                                               | 1.391                                                              | 1.527                                                               |
| μ/mm <sup>-1</sup>                          | 1.853                                                               | 1.787                                                              | 2.873                                                               |
| F(000)                                      | 1252.0                                                              | 1252.0                                                             | 1280.0                                                              |
| Crystal size/mm <sup>3</sup>                | 0.24 × 0.08 × 0.03                                                  | 0.24 × 0.08 × 0.03                                                 | 0.24 × 0.08 × 0.03                                                  |
| Radiation                                   | MoKα (λ = 0.71073)                                                  | MoKα (λ = 0.71073)                                                 | MoKα (λ = 0.71073)                                                  |
| 2θ range for data collection/°              | 3.884 to 50.496                                                     | 4.74 to 50.498                                                     | 3.918 to 53.998                                                     |
| Index ranges                                | -11 ≤ h ≤ 11<br>0 ≤ k ≤ 25<br>0 ≤ l ≤ 17                            | -11 ≤ h ≤ 11<br>-25 ≤ k ≤ 25<br>-17 ≤ l ≤ 17                       | -12 ≤ h ≤ 12<br>-26 ≤ k ≤ 22<br>-18 ≤ l ≤ 18                        |
| Reflections collected                       | 5190                                                                | 48426                                                              | 25790                                                               |
| Independent reflections                     | 5190<br>[R <sub>int</sub> = 0.0980,<br>R <sub>sigma</sub> = 0.0805] | 5371<br>[R <sub>int</sub> = 0.1147<br>R <sub>sigma</sub> = 0.0568] | 6086<br>[R <sub>int</sub> = 0.0465,<br>R <sub>sigma</sub> = 0.0426] |
| Data/restraints/parameters                  | 5190/0/332                                                          | 5371/7/331                                                         | 6086/0/331                                                          |
| Goodness-of-fit on F <sup>2</sup>           | 1.083                                                               | 1.071                                                              | 1.067                                                               |
| Final R indexes [I ≥ 2σ (I)]                | R <sub>1</sub> = 0.0467<br>wR <sub>2</sub> = 0.0822                 | R <sub>1</sub> = 0.0401<br>wR <sub>2</sub> = 0.0763                | R <sub>1</sub> = 0.0378<br>wR <sub>2</sub> = 0.0738                 |
| Final R indexes [all data]                  | R <sub>1</sub> = 0.0797<br>wR <sub>2</sub> = 0.0986                 | R <sub>1</sub> = 0.0794<br>wR <sub>2</sub> = 0.0970                | R <sub>1</sub> = 0.0464<br>wR <sub>2</sub> = 0.0767                 |
| Largest diff. peak/hole / e Å <sup>-3</sup> | 1.20/-0.73                                                          | 0.98/-0.59                                                         | 1.38/-1.28                                                          |

**Table S1 (continued).**

| Identification code                         | Ho_300K                                                            | Tm_100K                                                            | Tm_300K                                                            |
|---------------------------------------------|--------------------------------------------------------------------|--------------------------------------------------------------------|--------------------------------------------------------------------|
| Deposition number (CCDC)                    | 2528622                                                            | 2528621                                                            | 2528624                                                            |
| Empirical formula                           | C <sub>27</sub> H <sub>29</sub> HoN <sub>2</sub> O <sub>6</sub>    | C <sub>27</sub> H <sub>29</sub> N <sub>2</sub> O <sub>6</sub> Tm   | C <sub>27</sub> H <sub>29</sub> N <sub>2</sub> O <sub>6</sub> Tm   |
| Formula weight                              | 642.45                                                             | 646.45                                                             | 646.45                                                             |
| Temperature/K                               | 300(2)                                                             | 100(2)                                                             | 300(2)                                                             |
| Crystal system                              | monoclinic                                                         | monoclinic                                                         | monoclinic                                                         |
| Space group                                 | P2 <sub>1</sub> /n                                                 | P2 <sub>1</sub> /n                                                 | P2 <sub>1</sub> /n                                                 |
| a/Å                                         | 9.4837(7)                                                          | 9.3976(4)                                                          | 9.482(3)                                                           |
| b/Å                                         | 21.0014(14)                                                        | 20.7896(9)                                                         | 21.013(6)                                                          |
| c/Å                                         | 14.6551(10)                                                        | 14.3501(6)                                                         | 14.641(6)                                                          |
| α/°                                         | 90                                                                 | 90                                                                 | 90                                                                 |
| β/°                                         | 98.797(2)                                                          | 98.241(2)                                                          | 98.921(18)                                                         |
| γ/°                                         | 90                                                                 | 90                                                                 | 90                                                                 |
| Volume/Å <sup>3</sup>                       | 2884.5(3)                                                          | 2774.7(2)                                                          | 2881.8(17)                                                         |
| Z                                           | 4                                                                  | 4                                                                  | 4                                                                  |
| ρ <sub>calc</sub> /cm <sup>3</sup>          | 1.479                                                              | 1.548                                                              | 1.490                                                              |
| μ/mm <sup>-1</sup>                          | 2.782                                                              | 3.238                                                              | 3.118                                                              |
| F(000)                                      | 1280.0                                                             | 1288.0                                                             | 1288.0                                                             |
| Crystal size/mm <sup>3</sup>                | 0.12 × 0.1 × 0.02                                                  | 0.28 × 0.08 × 0.04                                                 | 0.28 × 0.08 × 0.04                                                 |
| Radiation                                   | MoKα (λ = 0.71073)                                                 | MoKα (λ = 0.71073)                                                 | MoKα (λ = 0.71073)                                                 |
| 2Θ range for data collection/°              | 3.878 to 52.76                                                     | 4.798 to 50.7                                                      | 4.76 to 55.752                                                     |
| Index ranges                                | -11 ≤ h ≤ 11<br>-26 ≤ k ≤ 26<br>-18 ≤ l ≤ 18                       | -11 ≤ h ≤ 11<br>-25 ≤ k ≤ 25<br>-17 ≤ l ≤ 17                       | -12 ≤ h ≤ 12<br>-27 ≤ k ≤ 27<br>-19 ≤ l ≤ 19                       |
| Reflections collected                       | 36092                                                              | 41183                                                              | 54804                                                              |
| Independent reflections                     | 5894<br>[R <sub>int</sub> = 0.0595<br>R <sub>sigma</sub> = 0.0426] | 5089<br>[R <sub>int</sub> = 0.0768<br>R <sub>sigma</sub> = 0.0427] | 6883<br>[R <sub>int</sub> = 0.0570<br>R <sub>sigma</sub> = 0.0340] |
| Data/restraints/parameters                  | 5894/7/331                                                         | 5089/0/331                                                         | 6883/6/331                                                         |
| Goodness-of-fit on F <sup>2</sup>           | 1.197                                                              | 1.033                                                              | 1.048                                                              |
| Final R indexes [I ≥ 2σ (I)]                | R <sub>1</sub> = 0.0437<br>wR <sub>2</sub> = 0.0797                | R <sub>1</sub> = 0.0314<br>wR <sub>2</sub> = 0.0624                | R <sub>1</sub> = 0.0329<br>wR <sub>2</sub> = 0.0590                |
| Final R indexes [all data]                  | R <sub>1</sub> = 0.0655<br>wR <sub>2</sub> = 0.0854                | R <sub>1</sub> = 0.0420<br>wR <sub>2</sub> = 0.0657                | R <sub>1</sub> = 0.0478<br>wR <sub>2</sub> = 0.0641                |
| Largest diff. peak/hole / e Å <sup>-3</sup> | 0.70/-0.70                                                         | 1.04/-1.13                                                         | 1.07/-1.02                                                         |

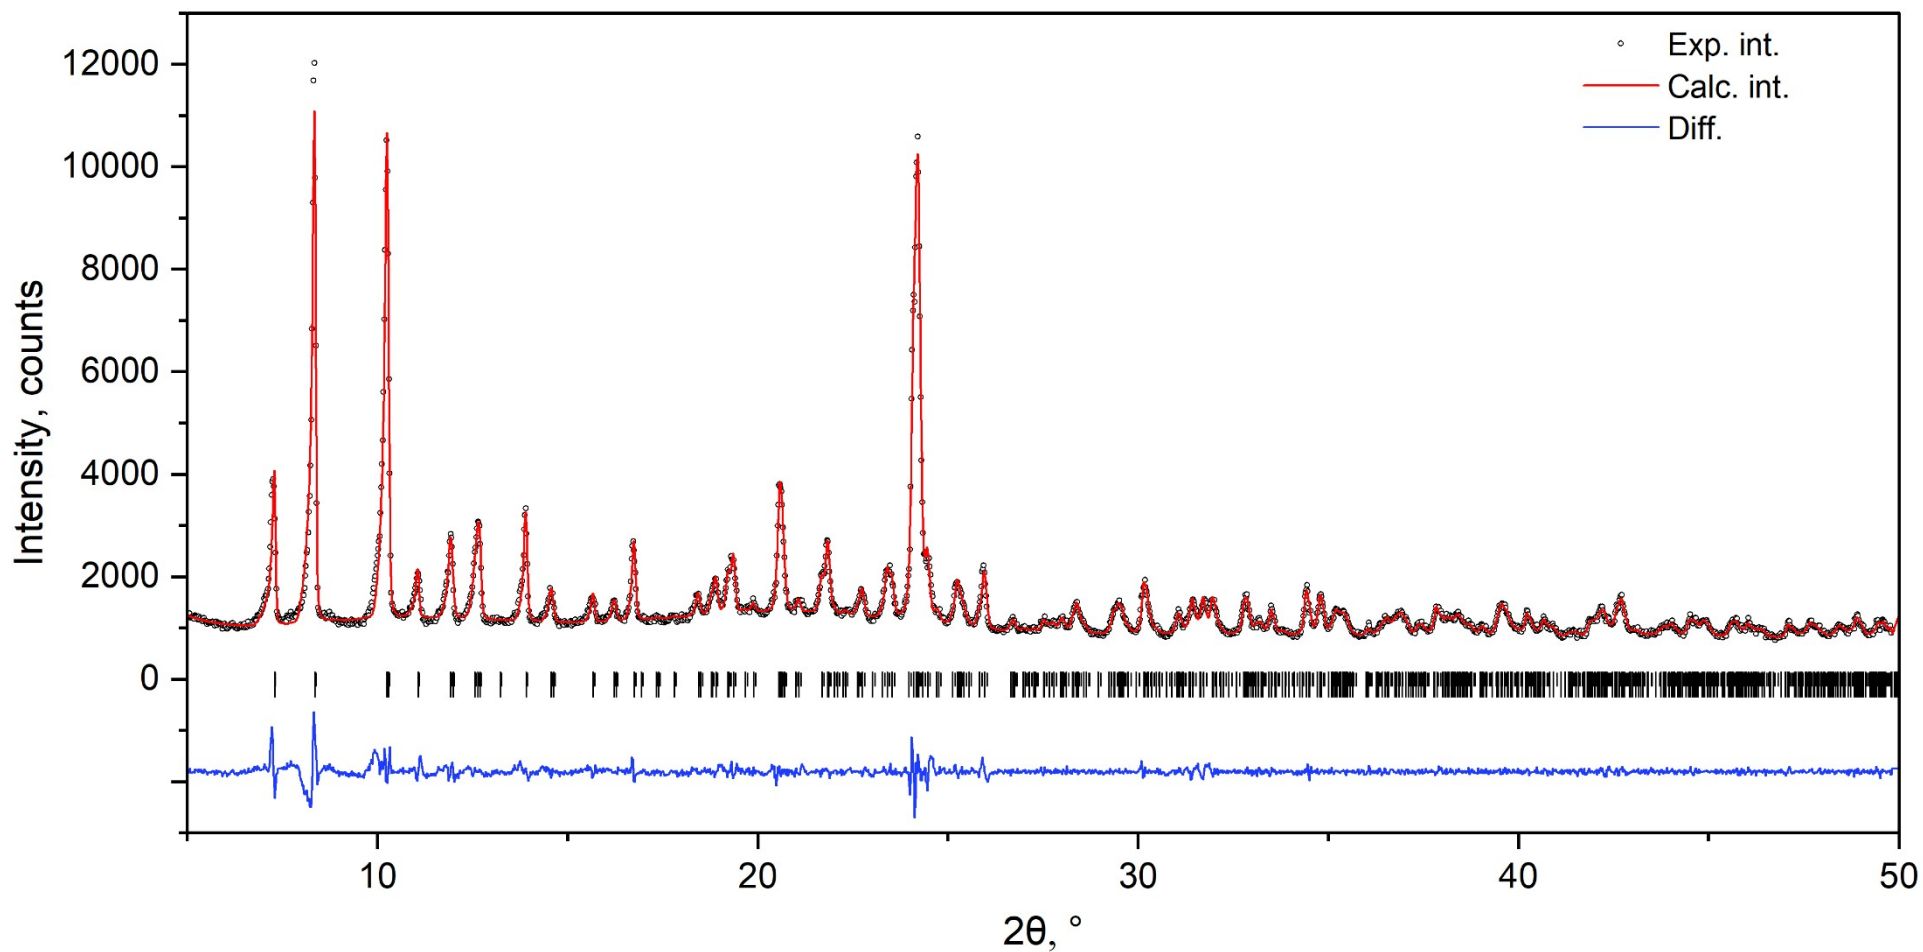

**Fig. S1.** Le Bail refinement results for powder pattern of Nd. The picture shows experimental (black round marks) and calculated (red line) data with difference curve ( $I(\text{exp})-I(\text{calc})$ , blue line) and  $\text{CuK}_{\alpha 1}$  (major black ticks) and  $\text{CuK}_{\alpha 2}$  (minor black ticks) peaks positions.

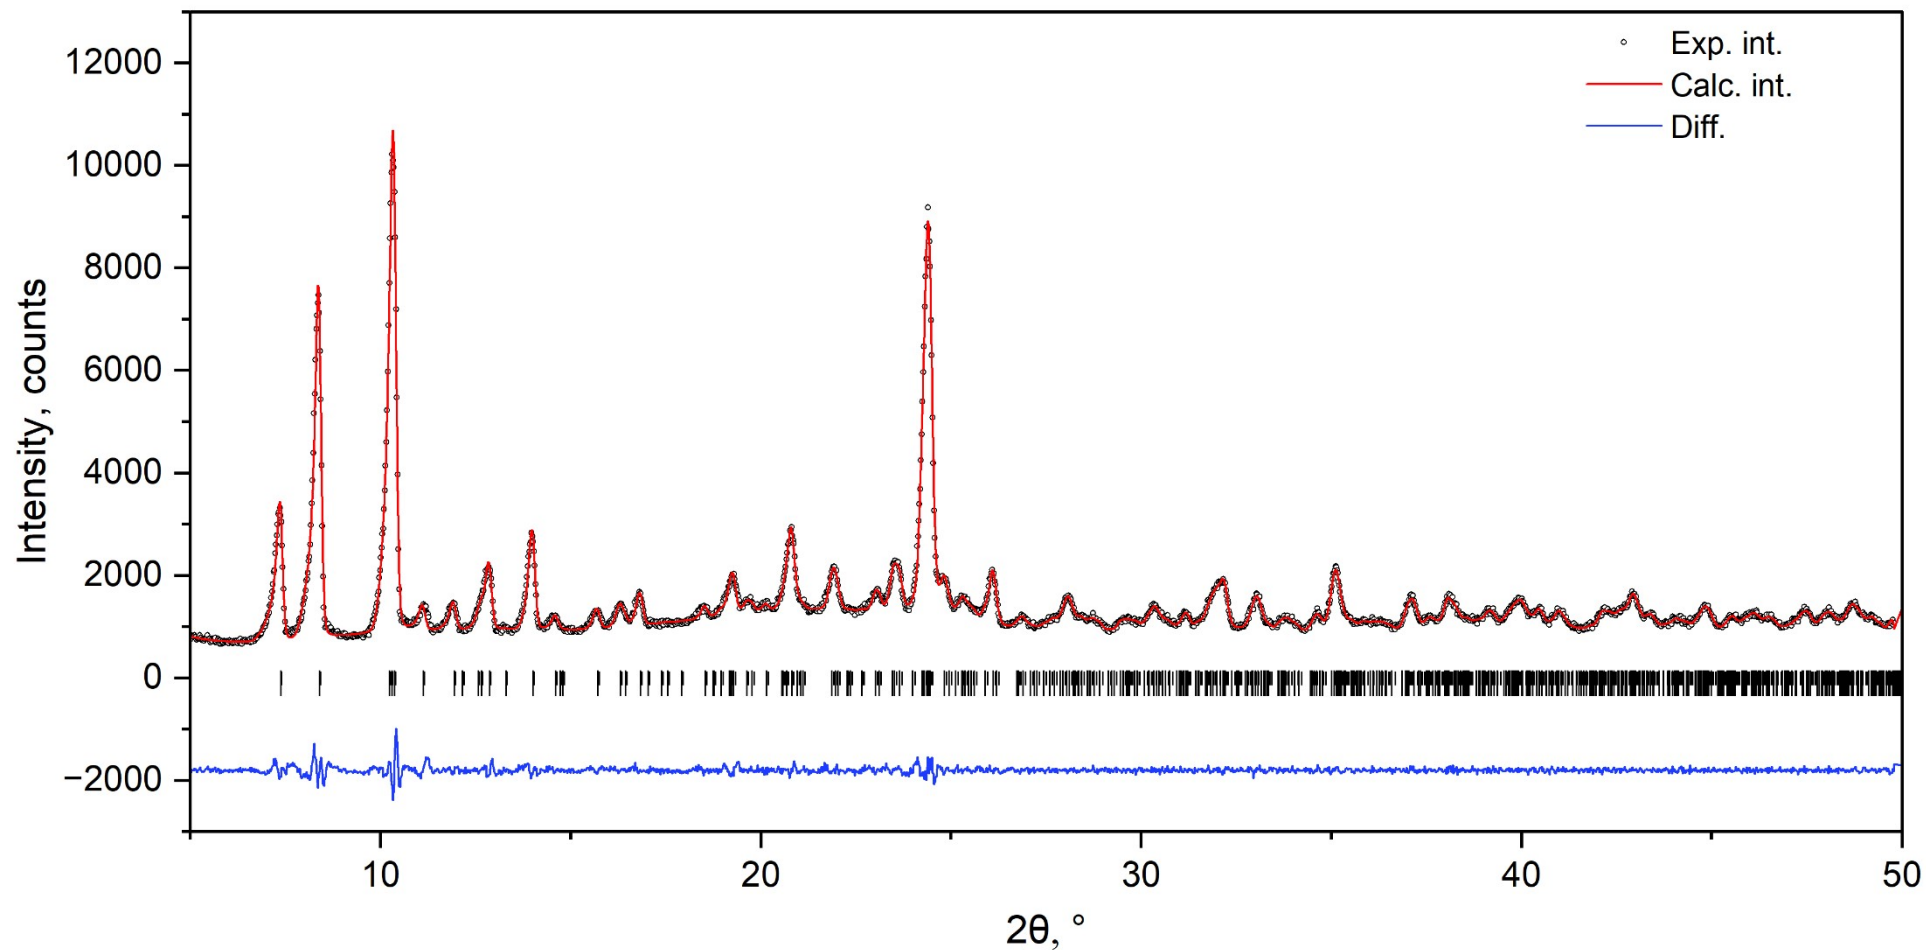

**Fig. S2.** Le Bail refinement results for powder pattern of **Ho**. The picture shows experimental (black round marks) and calculated (red line) data with difference curve ( $I(\text{exp})-I(\text{calc})$ , blue line) and  $\text{CuK}_{\alpha 1}$  (major black ticks) and  $\text{CuK}_{\alpha 2}$  (minor black ticks) peaks positions.

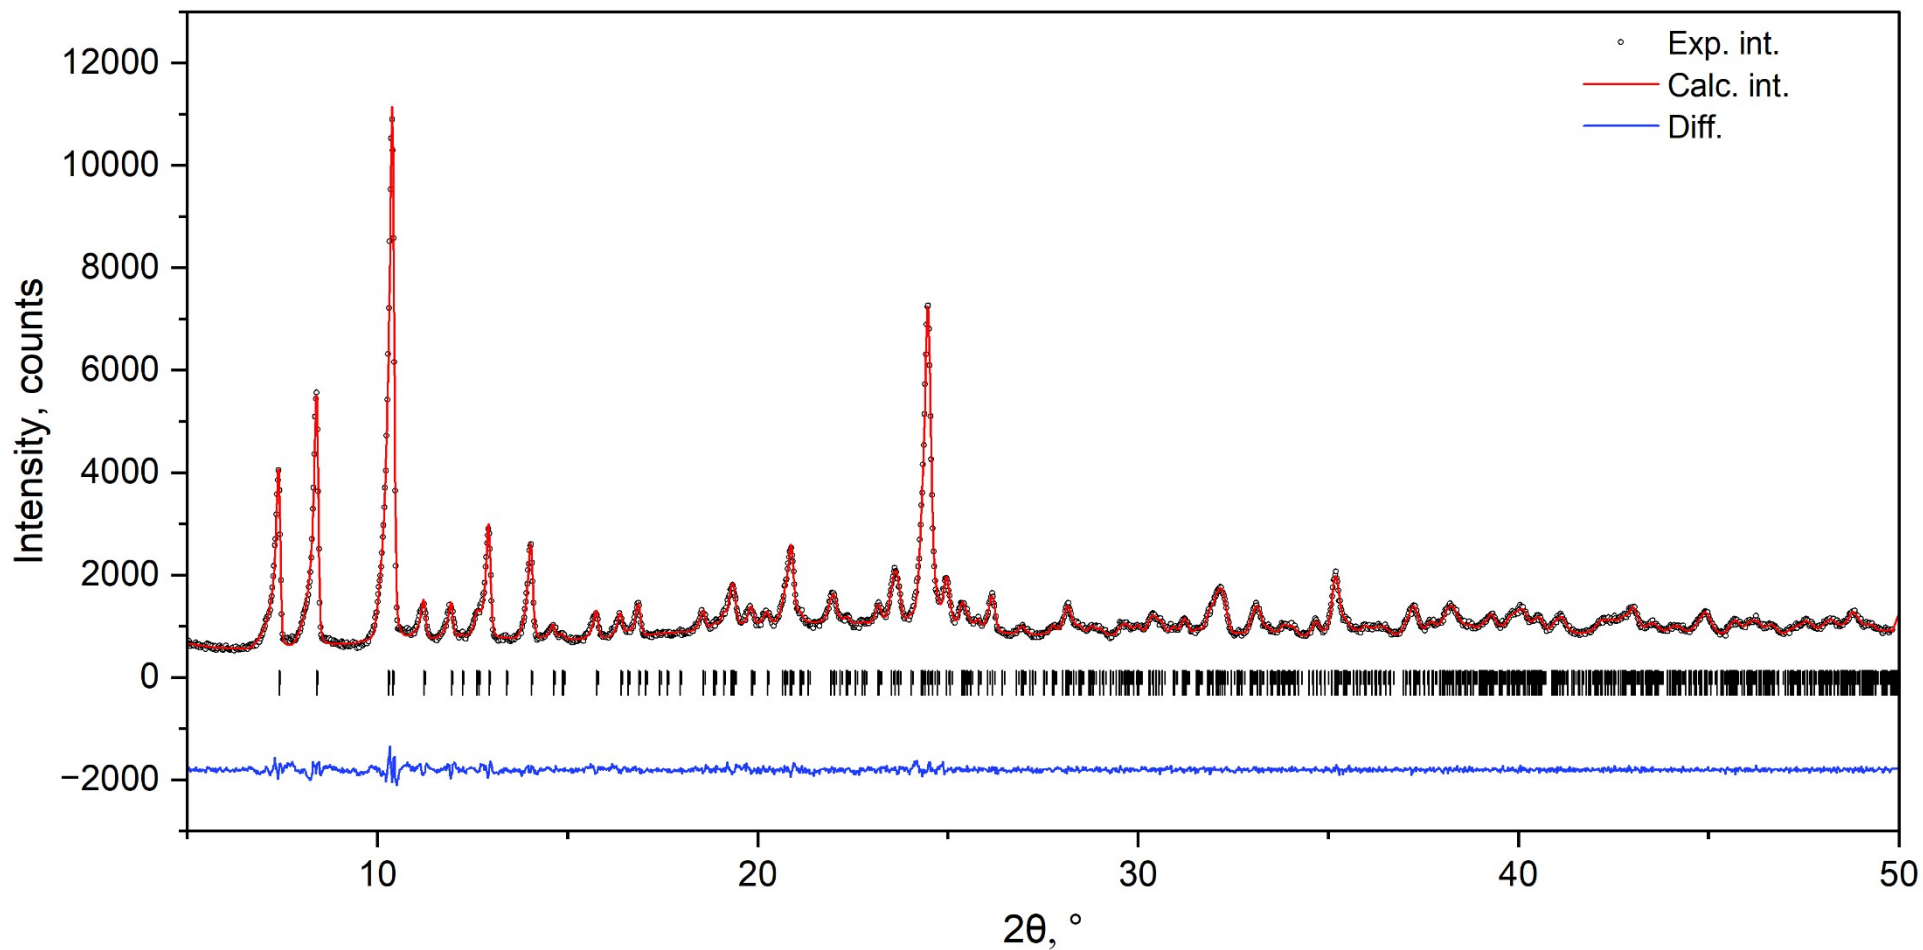

**Fig. S3.** Le Bail refinement results for powder pattern of **Tm**. The picture shows experimental (black round marks) and calculated (red line) data with difference curve ( $I(\text{exp}) - I(\text{calc})$ , blue line) and  $\text{CuK}_{\alpha 1}$  (major black ticks) and  $\text{CuK}_{\alpha 2}$  (minor black ticks) peaks positions.

**Table S2.** Le Bail refinement indicators and refined parameters for powder patterns of polycrystalline samples of complexes synthesized.

| Sample    | SG                 | $a$ , Å   | $b$ , Å     | $c$ , Å    | $\alpha$ , ° | $\beta$ , ° | $\gamma$ , ° | $R_p$ | $wR_p$ | GOF  |
|-----------|--------------------|-----------|-------------|------------|--------------|-------------|--------------|-------|--------|------|
| <b>Nd</b> | P2 <sub>1</sub> /n | 9.5783(6) | 21.1574(7)  | 14.9666(6) | 90           | 99.488(6)   | 90           | 3.55  | 5.07   | 1.87 |
| <b>Ho</b> | P2 <sub>1</sub> /n | 9.5917(7) | 21.0569(14) | 14.7422(9) | 90           | 99.190(7)   | 90           | 2.84  | 3.80   | 1.41 |
| <b>Tm</b> | P2 <sub>1</sub> /n | 9.5285(7) | 21.0098(11) | 14.6330(9) | 90           | 98,605(6)   | 90           | 2.84  | 3.79   | 1.29 |

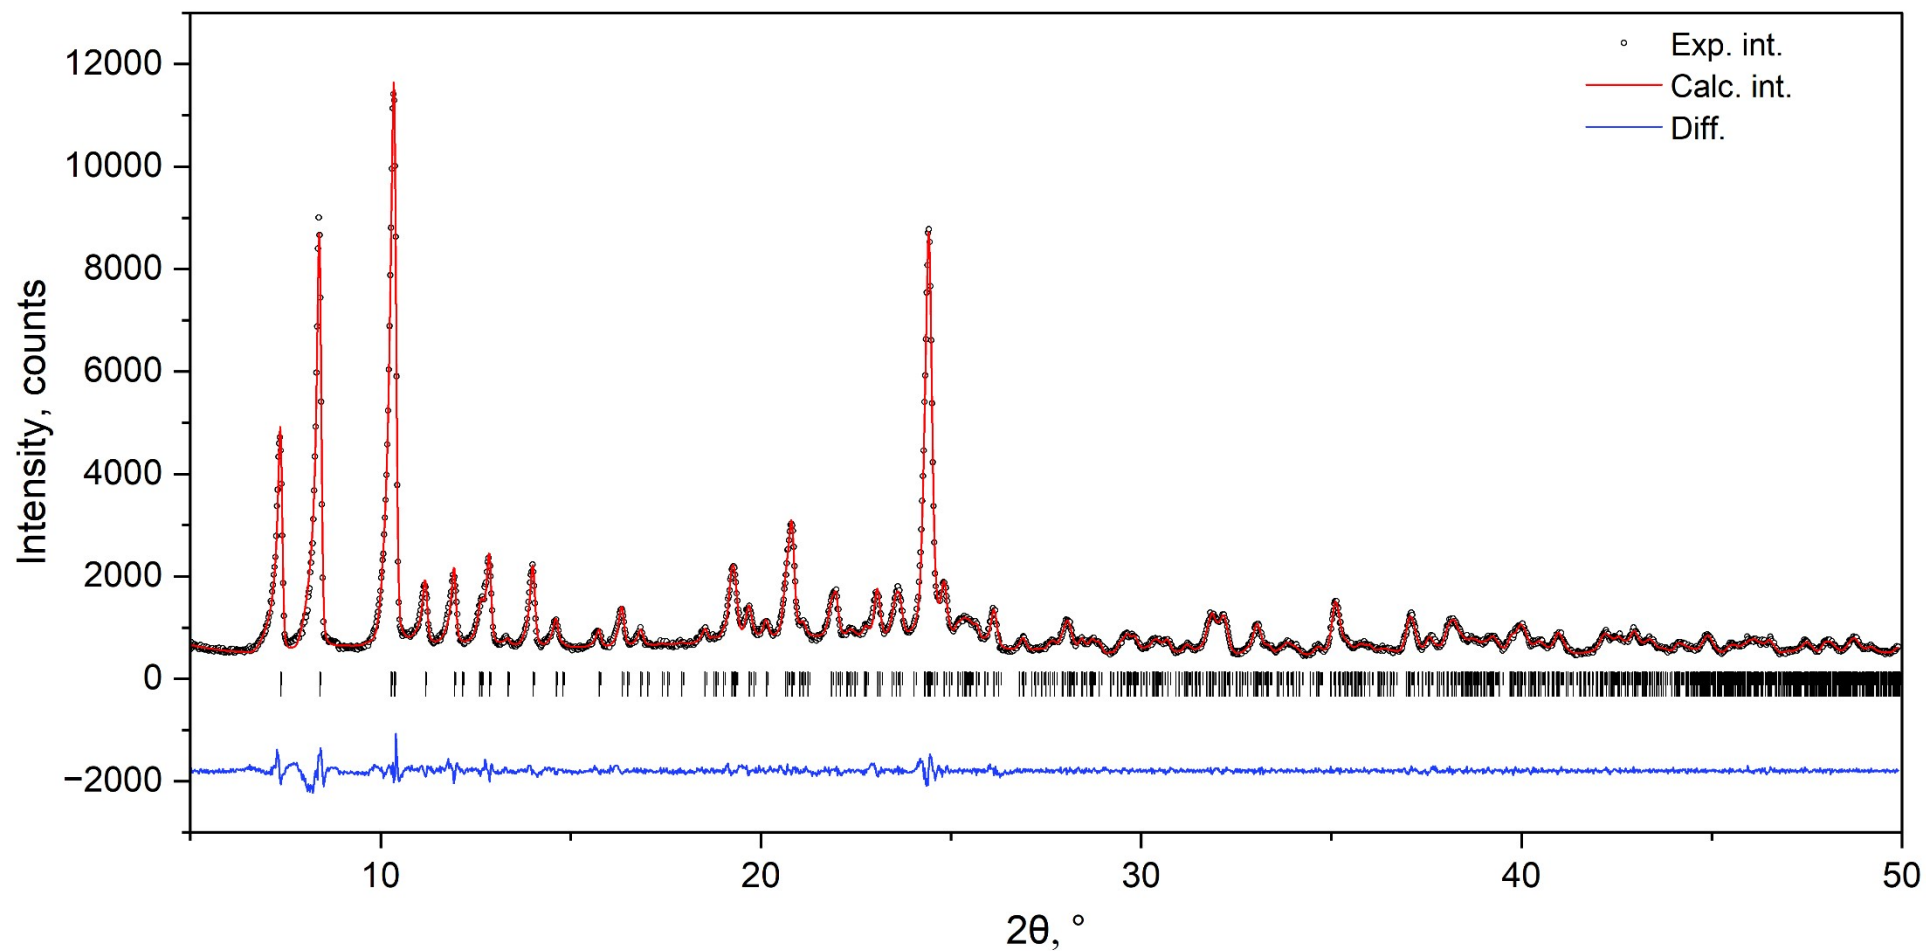

**Fig. S4.** Le Bail refinement results for powder pattern of Nd@Y. The picture shows experimental (black round marks) and calculated (red line) data with difference curve ( $I(exp)-I(calc)$ , blue line) and CuK<sub>a1</sub> (major black ticks) and CuK<sub>a2</sub> (minor black ticks) peaks positions.

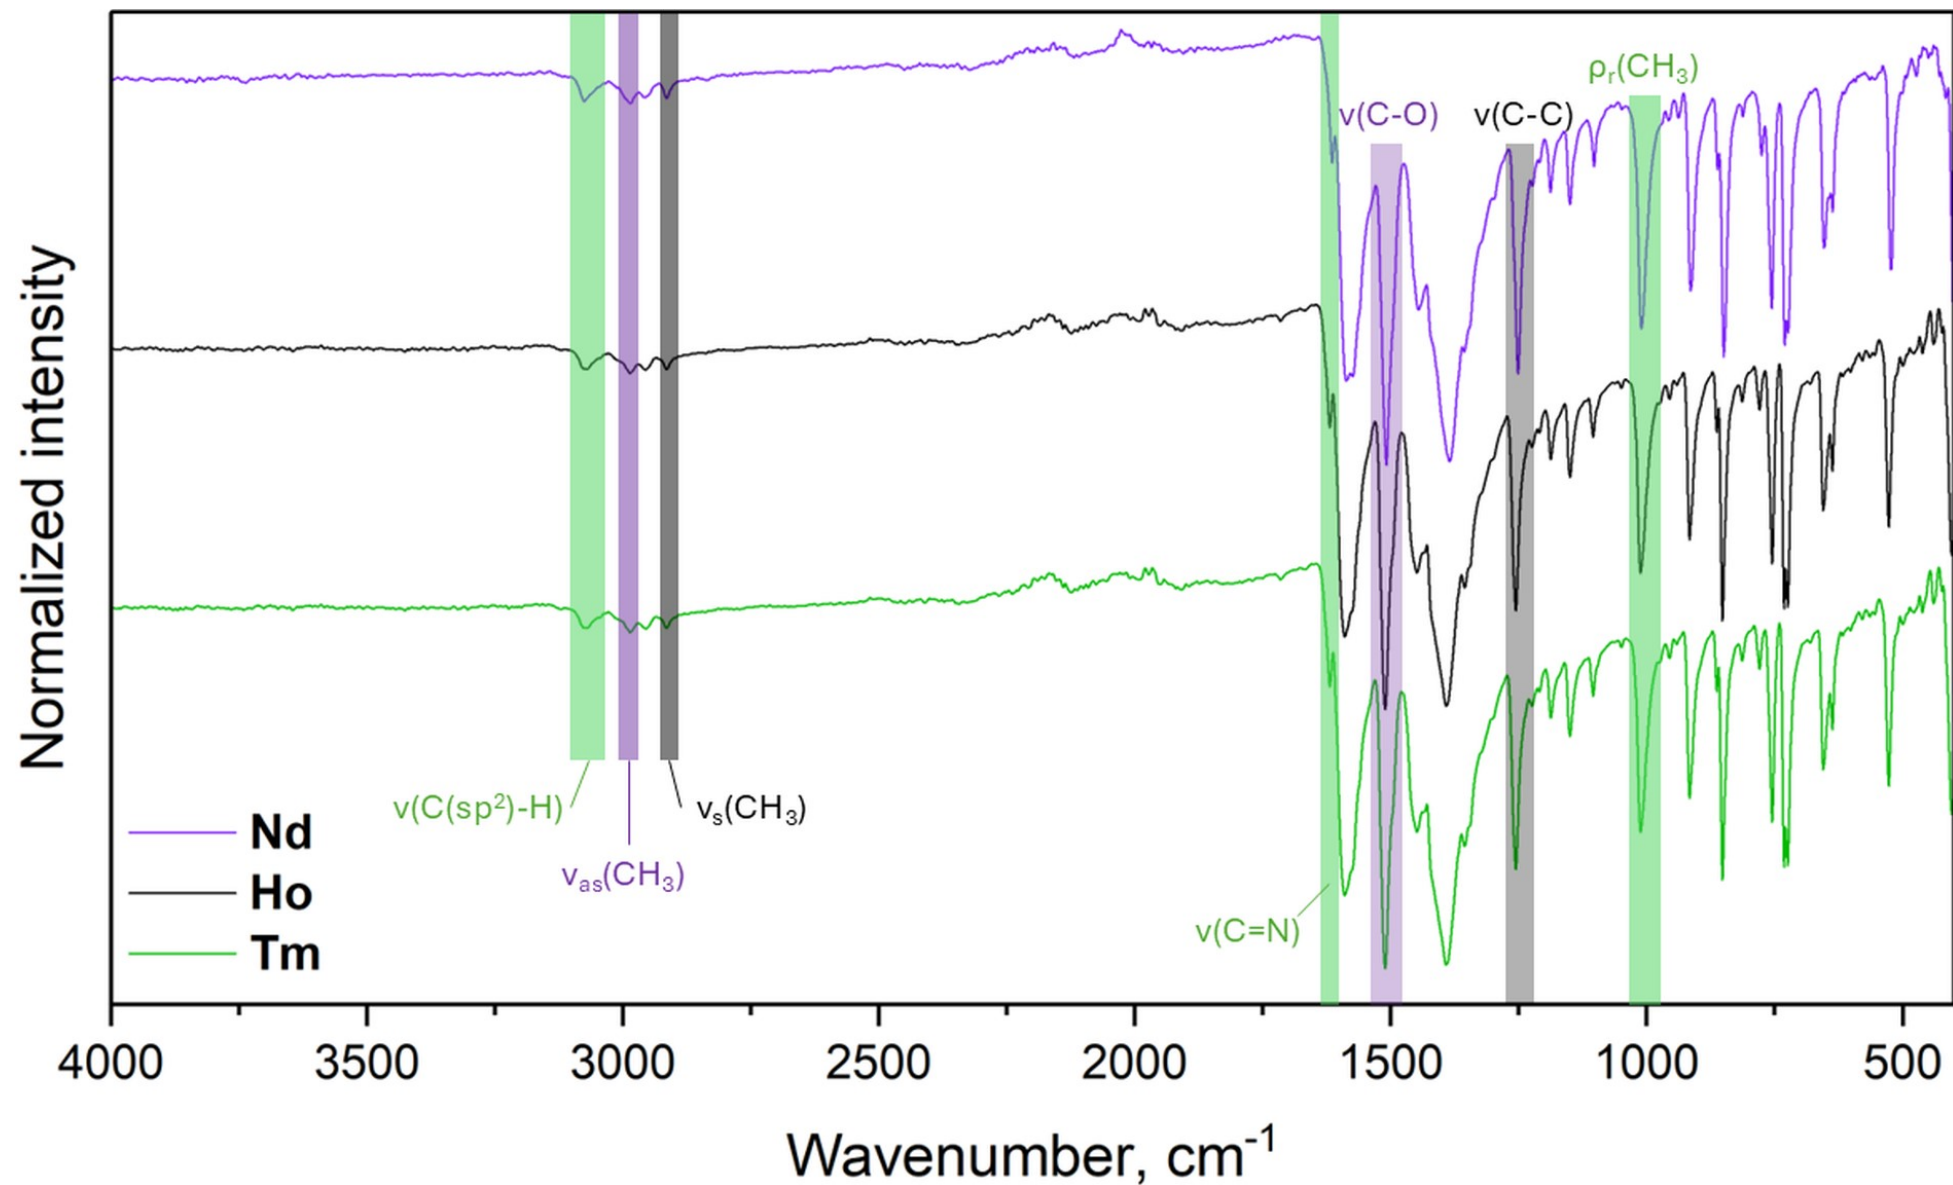

Fig. S5. Normalized ATR-IR spectra of **Nd**, **Ho** and **Tm** with the assignments for the most characteristic bands.

**Table S3.** SHAPE calculations for structures studied at 100 and 300K.

| Structure      | OP-8   | HPY-8  | HBPY-8 | CU-8   | SAPR-8       | TDD-8 | JGBF-8 | JETBPY-8 | JBTPR-8 | BTPR-8 | JSD-8 | TT-8   | ETBPY-8 |
|----------------|--------|--------|--------|--------|--------------|-------|--------|----------|---------|--------|-------|--------|---------|
| <b>Nd 100K</b> | 30.932 | 22.172 | 17.063 | 10.197 | <b>0.603</b> | 2.697 | 16.875 | 28.243   | 2.920   | 2.455  | 5.446 | 11.038 | 23.451  |
| <b>Nd 300K</b> | 30.667 | 22.108 | 16.921 | 9.838  | <b>0.576</b> | 2.656 | 16.830 | 28.194   | 3.062   | 2.532  | 5.697 | 10.596 | 23.211  |
| <b>Ho 100K</b> | 29.668 | 22.581 | 16.559 | 9.792  | <b>0.375</b> | 2.238 | 17.013 | 28.107   | 2.704   | 2.226  | 4.951 | 10.646 | 24.032  |
| <b>Ho 300K</b> | 29.866 | 22.661 | 16.596 | 9.822  | <b>0.391</b> | 2.529 | 17.012 | 28.027   | 2.912   | 2.425  | 5.286 | 10.671 | 23.936  |
| <b>Tm 100K</b> | 29.411 | 22.795 | 16.539 | 9.840  | <b>0.353</b> | 2.187 | 16.835 | 27.924   | 2.688   | 2.229  | 4.836 | 10.673 | 24.206  |
| <b>Tm 300K</b> | 29.808 | 22.745 | 16.582 | 9.870  | <b>0.396</b> | 2.458 | 16.925 | 28.000   | 2.901   | 2.449  | 5.191 | 10.718 | 24.100  |

### Reference shapes

Coordination number = 8

OP-8 ( $D_{8h}$ ) – Octagon

HPY-8 ( $C_{7v}$ ) – Heptagonal pyramid

HBPY-8 ( $D_{6h}$ ) – Hexagonal bipyramid

CU-8 ( $O_h$ ) – Cube

SAPR-8 ( $D_{4d}$ ) – Square antiprism

TDD-8 ( $D_{2d}$ ) – Triangular dodecahedron

JGBF-8 ( $D_{2d}$ ) – Johnson – Gyrobifastigium J26

JETBPY-8 ( $D_{3h}$ ) - Johnson – Elongated triangular bipyramid J14

JBTP-8 ( $C_{2v}$ ) - Johnson – Biaugmented trigonal prism J50

BTPR-8 ( $C_{2v}$ ) – Biaugmented trigonal prism

JSD-8 ( $D_{2d}$ ) – Snub Disphenoid J84

TT-8 ( $T_d$ ) – Triakis tetrahedron

ETBPY-8 ( $D_{3h}$ ) – Elongated trigonal bipyramid

**Table S4.** Geometric parameters of the square antiprismatic polyhedra in structures of **Nd**, **Ho** and **Tm** at 100 and 300 K.

| Structure                                                                                 | Nd_100K   | Nd_300K   | Ho_100K   | Ho_300K   | Tm_100K   | Tm_300K   |
|-------------------------------------------------------------------------------------------|-----------|-----------|-----------|-----------|-----------|-----------|
| Average rms deviation for O <sub>1</sub> O <sub>2</sub> O <sub>3</sub> O <sub>4</sub> , Å | 0.041     | 0.025     | 0.033     | 0.015     | 0.039     | 0.024     |
| Average rms deviation for O <sub>5</sub> O <sub>6</sub> N <sub>1</sub> N <sub>2</sub> , Å | 0.000     | 0.005     | 0.018     | 0.006     | 0.016     | 0.002     |
| Angle between antiprism bases, °                                                          | 3.6       | 3.1       | 2.1       | 2.3       | 1.7       | 2.0       |
| Range of the flatness angle, °                                                            | 53.7-58.8 | 53.8-59.0 | 55.0-59.1 | 54.7-59.2 | 55.2-59.2 | 54.9-59.0 |
| Average Ln-O distances, Å                                                                 | 2.403(4)  | 2.399(4)  | 2.312(3)  | 2.313(4)  | 2.291(3)  | 2.292(3)  |
| Average Ln-N distances, Å                                                                 | 2.647(5)  | 2.650(5)  | 2.537(4)  | 2.549(5)  | 2.515(3)  | 2.538(3)  |

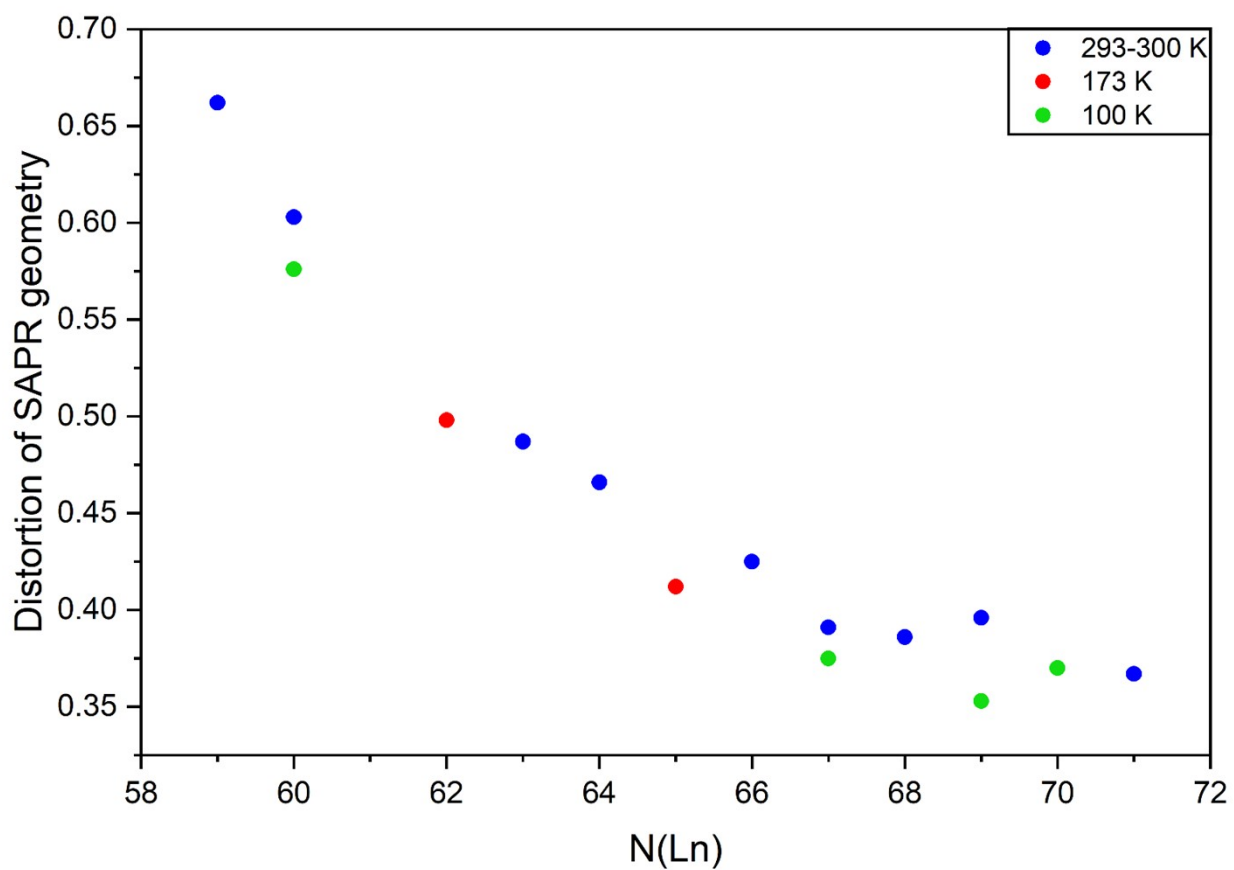

**Fig. S6.** The distortion of the coordination polyhedron in  $[\text{Ln}(\text{acac})_3(\text{phen})]$  structures as function of the lanthanide number.

**Table S5.** Selected bond lengths (Ln environment) for the studied structures.

| Nd_100K |      |          | Nd_300K |      |          | Ho_100K |      |          |
|---------|------|----------|---------|------|----------|---------|------|----------|
| Atom    | Atom | Length/Å | Atom    | Atom | Length/Å | Atom    | Atom | Length/Å |
| Nd1     | O6   | 2.368(4) | Nd1     | O6   | 2.379(4) | Ho1     | O6   | 2.288(3) |
| Nd1     | O3   | 2.389(4) | Nd1     | O3   | 2.388(4) | Ho1     | O3   | 2.311(3) |
| Nd1     | O4   | 2.419(4) | Nd1     | O4   | 2.409(4) | Ho1     | O4   | 2.321(3) |
| Nd1     | O5   | 2.414(4) | Nd1     | O5   | 2.401(4) | Ho1     | O5   | 2.309(3) |
| Nd1     | O2   | 2.399(4) | Nd1     | O2   | 2.403(4) | Ho1     | O2   | 2.311(3) |
| Nd1     | N2   | 2.678(5) | Nd1     | N2   | 2.667(5) | Ho1     | N2   | 2.560(4) |
| Nd1     | O1   | 2.429(4) | Nd1     | O1   | 2.415(4) | Ho1     | O1   | 2.334(3) |
| Nd1     | N1   | 2.616(5) | Nd1     | N1   | 2.633(4) | Ho1     | N1   | 2.514(4) |
| Ho_300K |      |          | Tm_100K |      |          | Tm_300K |      |          |
| Atom    | Atom | Length/Å | Atom    | Atom | Length/Å | Atom    | Atom | Length/Å |
| Ho1     | O6   | 2.292(4) | Tm1     | O6   | 2.265(3) | Tm1     | O6   | 2.269(3) |
| Ho1     | O3   | 2.306(4) | Tm1     | O3   | 2.284(3) | Tm1     | O3   | 2.284(3) |
| Ho1     | O4   | 2.328(4) | Tm1     | O4   | 2.311(3) | Tm1     | O4   | 2.311(3) |
| Ho1     | O5   | 2.312(4) | Tm1     | O5   | 2.290(3) | Tm1     | O5   | 2.289(3) |
| Ho1     | O2   | 2.304(4) | Tm1     | O2   | 2.287(3) | Tm1     | O2   | 2.288(3) |
| Ho1     | N2   | 2.571(5) | Tm1     | N2   | 2.539(3) | Tm1     | N2   | 2.561(3) |
| Ho1     | O1   | 2.335(4) | Tm1     | O1   | 2.309(3) | Tm1     | O1   | 2.309(3) |
| Ho1     | N1   | 2.527(5) | Tm1     | N1   | 2.490(3) | Tm1     | N1   | 2.515(3) |

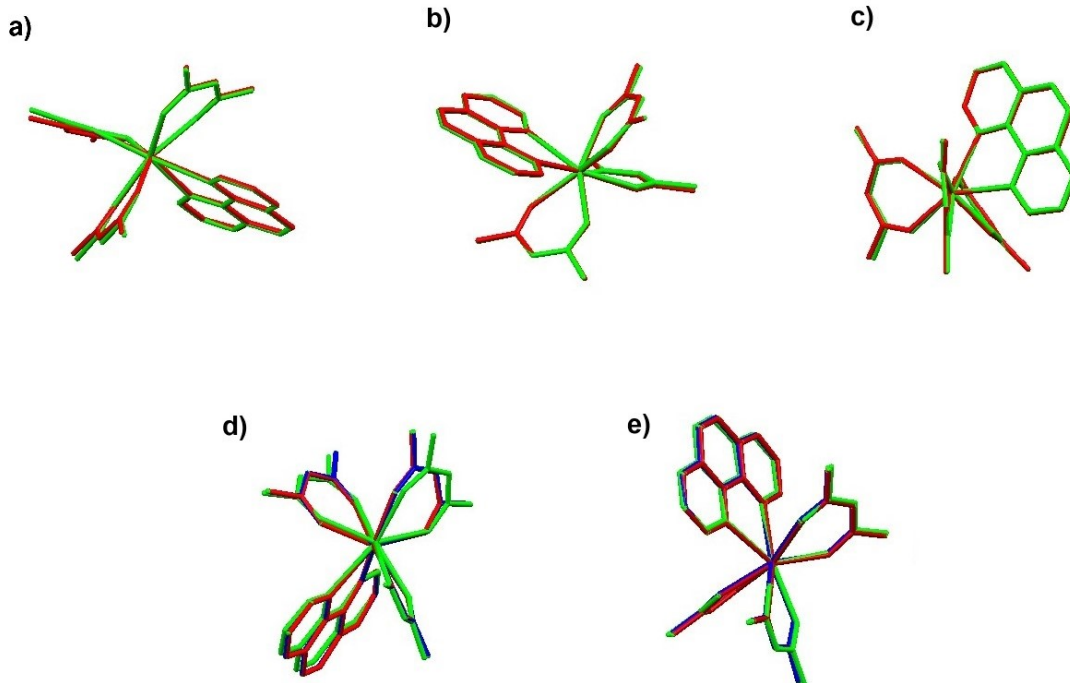**Fig. S7.** Overlaying of the  $[\text{Ln}(\text{acac})_3(\text{phen})]$  fragments: a) Nd\_100K (green) and Nd\_300K (red); b) Ho\_100K (green) and Ho\_300K; c) Tm\_100K (green) and Tm\_300K (red); d) Nd\_100K (green), Ho\_100K (blue) and Tm\_100K (red); e) Nd\_300K (green), Ho\_300K (blue) and Tm\_300K (red).

**Table S6.** The shortest Ln...Ln distances in the studied structures.

| Structure      | Ln...Ln shortest distances |           |           |
|----------------|----------------------------|-----------|-----------|
| <b>Nd_100K</b> | 8.537(1)                   | 9.064(1)  | 9.420(1)  |
| <b>Nd_300K</b> | 8.448(4)                   | 9.122(5)  | 9.520(5)  |
| <b>Ho_100K</b> | 7.9708(8)                  | 8.9852(8) | 9.4176(8) |
| <b>Ho_300K</b> | 8.2154(8)                  | 9.0612(8) | 9.4837(8) |
| <b>Tm_100K</b> | 7.9460(6)                  | 8.9614(6) | 9.3976(5) |
| <b>Tm_300K</b> | 8.188(3)                   | 9.056(4)  | 9.482(4)  |

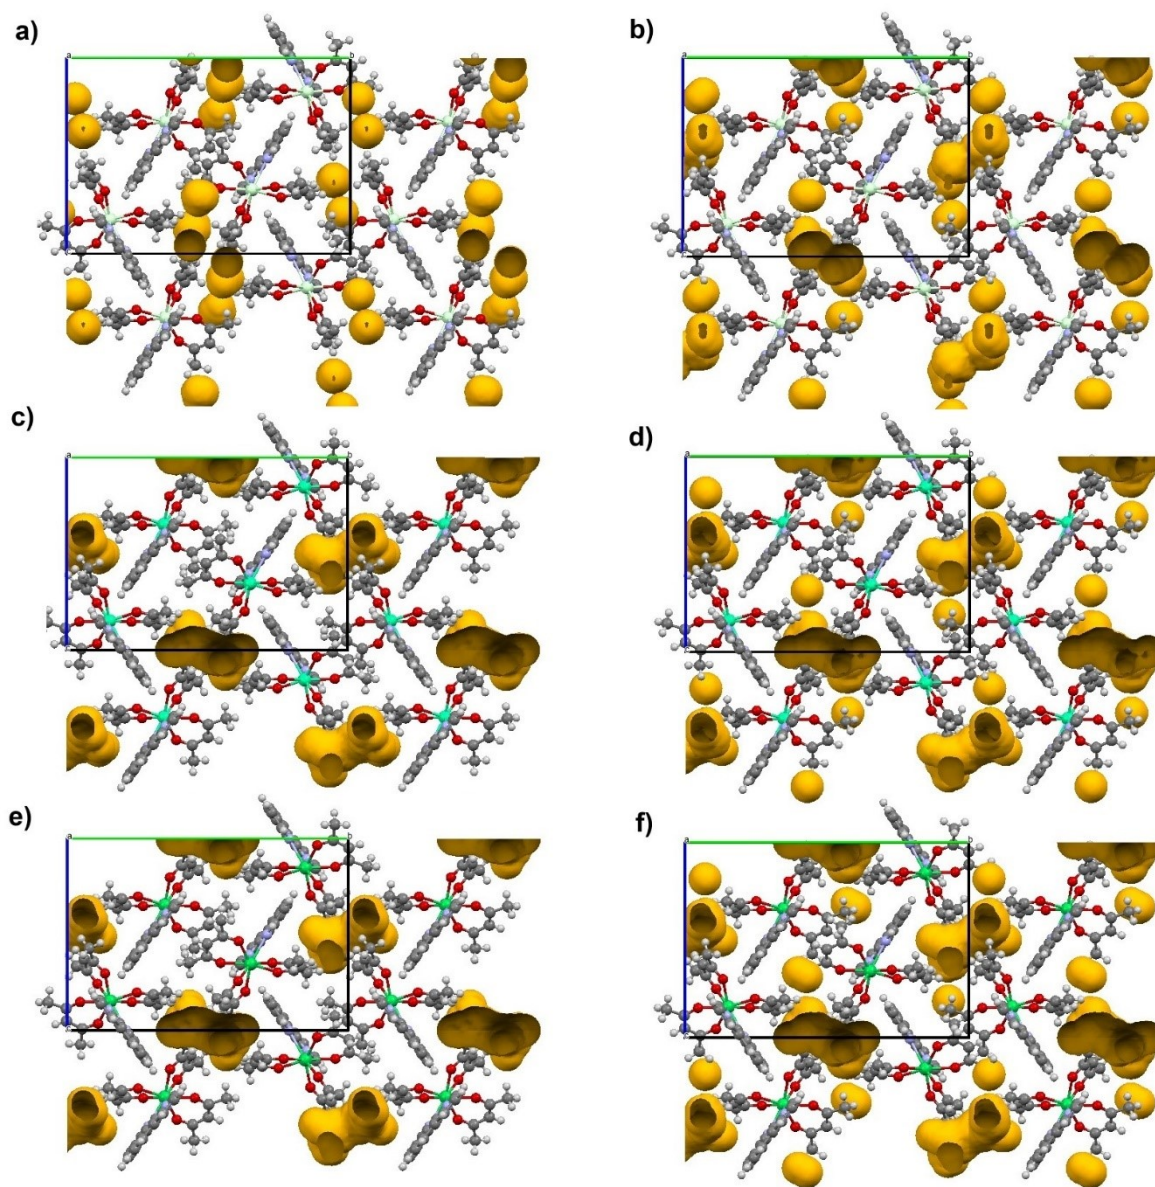

**Fig. S8.** Visualization of the voids (probe radius 1.2 Å) in structures **Nd\_100K** (a), **Nd\_300K** (b), **Ho\_100K** (c), **Ho\_300K** (d), **Tm\_100K** (e) and **Tm\_300K** (f).

**Table S7.** Voids (probe radius 1.2 Å) parameters in the structures of **Nd**, **Ho**, **Tm** at 100 and 300K.

| Compound  | Temperature, K | Unit cell volume, Å <sup>3</sup> | Unit cell voids volume, Å <sup>3</sup> | Voids fraction, % |
|-----------|----------------|----------------------------------|----------------------------------------|-------------------|
| <b>Nd</b> | 100            | 2862.8(5)                        | 100                                    | 3.5               |
| <b>Nd</b> | 300            | 2968(3)                          | 155                                    | 5.2               |
| <b>Gd</b> | 293            | 2916.99(17)                      | 198                                    | 6.8               |
| <b>Ho</b> | 100            | 2793.7(3)                        | 197                                    | 7.0               |
| <b>Ho</b> | 300            | 2884.5(3)                        | 215                                    | 7.5               |
| <b>Er</b> | 295            | 2881.0(6)                        | 198                                    | 7.6               |
| <b>Tm</b> | 100            | 2774.7(2)                        | 191                                    | 6.9               |
| <b>Tm</b> | 300            | 2881.8(17)                       | 232                                    | 8.0               |

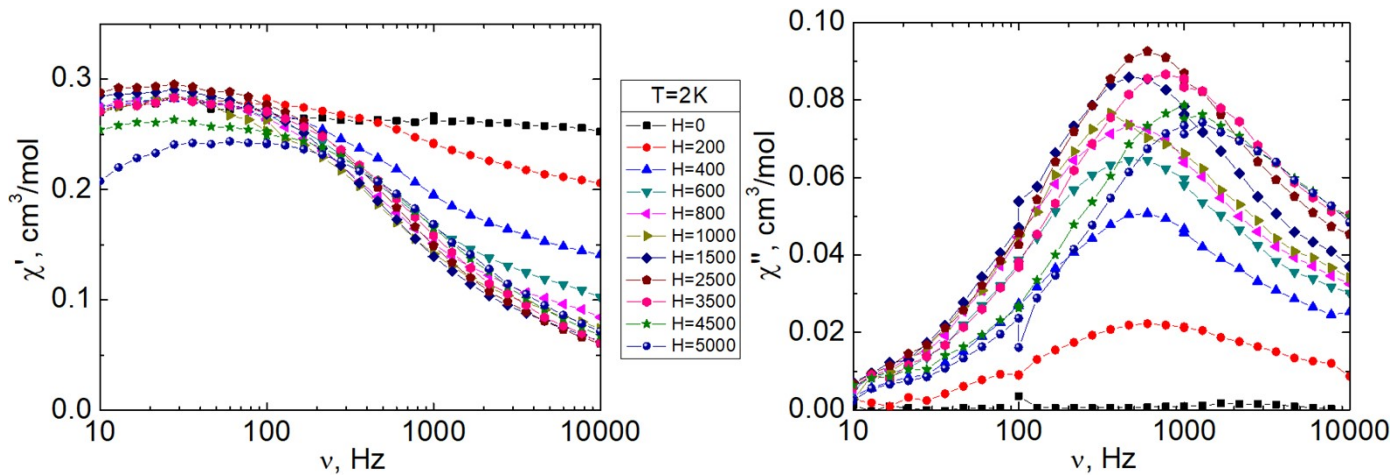

**Fig. S9.** Frequency dependencies of the in-phase ( $\chi'$ , left) and out-of-phase ( $\chi''$ , right) components of the dynamic magnetic susceptibility of complex **Nd** measured at  $T=2\text{K}$  under various DC magnetic fields. Solid lines are visual guides.

**Table S8.** Various approximations of  $\tau$  vs.  $1/T$  dependency for complex Nd under a DC field of 1000 Oe.

| Dependence of the relaxation time $\tau$ on the reciprocal temperature for Tb complex 1 ( $H = 1$ kOe, $T = 2-4$ K).                                                                                                                                                                                                                                                                                                                                                                                                                                                                                                                                                                                                                                                                                                                                                                                                                                                                                                                                                                                                                                                                                                                                                        | Fit function, temperature range, and the best-fit parameters with uncertainties. |                   |            |  |          |                                           |  |  |                 |             |  |  |               |         |  |  |     |         |            |            |     |         |          |         |                                                                                                                                                                                                                                                         |           |            |            |          |                         |          |         |                 |             |      |   |                                                                                                                                                                                                                                                                                                                                                                           |         |  |  |     |   |            |            |     |   |         |         |                                                                                                                                                                                                                                                                                                                                                                                                                                                                                                                                                                            |
|-----------------------------------------------------------------------------------------------------------------------------------------------------------------------------------------------------------------------------------------------------------------------------------------------------------------------------------------------------------------------------------------------------------------------------------------------------------------------------------------------------------------------------------------------------------------------------------------------------------------------------------------------------------------------------------------------------------------------------------------------------------------------------------------------------------------------------------------------------------------------------------------------------------------------------------------------------------------------------------------------------------------------------------------------------------------------------------------------------------------------------------------------------------------------------------------------------------------------------------------------------------------------------|----------------------------------------------------------------------------------|-------------------|------------|--|----------|-------------------------------------------|--|--|-----------------|-------------|--|--|---------------|---------|--|--|-----|---------|------------|------------|-----|---------|----------|---------|---------------------------------------------------------------------------------------------------------------------------------------------------------------------------------------------------------------------------------------------------------|-----------|------------|------------|----------|-------------------------|----------|---------|-----------------|-------------|------|---|---------------------------------------------------------------------------------------------------------------------------------------------------------------------------------------------------------------------------------------------------------------------------------------------------------------------------------------------------------------------------|---------|--|--|-----|---|------------|------------|-----|---|---------|---------|----------------------------------------------------------------------------------------------------------------------------------------------------------------------------------------------------------------------------------------------------------------------------------------------------------------------------------------------------------------------------------------------------------------------------------------------------------------------------------------------------------------------------------------------------------------------------|
| <p style="text-align: center;"><math>H_{DC} = 1000</math> Oe</p> 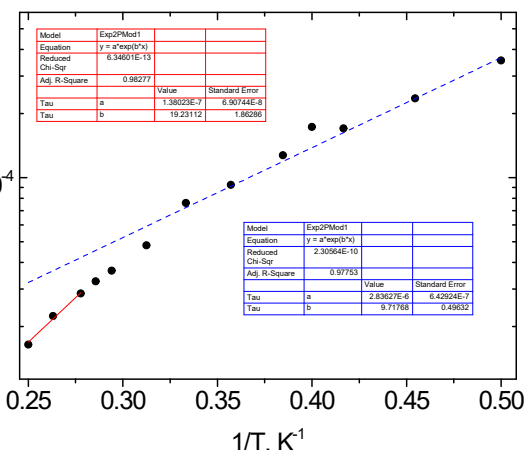 <table border="1" data-bbox="231 369 470 470"> <thead> <tr> <th>Model</th> <th>Exp2PMod1</th> <th></th> <th></th> </tr> </thead> <tbody> <tr> <td>Equation</td> <td><math>y = a \cdot \exp(b/x)</math></td> <td></td> <td></td> </tr> <tr> <td>Reduced Chi-Sqr</td> <td>6.34601E-13</td> <td></td> <td></td> </tr> <tr> <td>Adj. R-Square</td> <td>0.98277</td> <td></td> <td></td> </tr> <tr> <td>Tau</td> <td>a</td> <td>1.38022E-7</td> <td>6.90144E-8</td> </tr> <tr> <td>Tau</td> <td>b</td> <td>19.23112</td> <td>1.86296</td> </tr> </tbody> </table> <table border="1" data-bbox="446 560 678 660"> <thead> <tr> <th>Model</th> <th>Exp2PMod1</th> <th></th> <th></th> </tr> </thead> <tbody> <tr> <td>Equation</td> <td><math>y = a \cdot \exp(b/x)</math></td> <td></td> <td></td> </tr> <tr> <td>Reduced Chi-Sqr</td> <td>2.30564E-10</td> <td></td> <td></td> </tr> <tr> <td>Adj. R-Square</td> <td>0.97753</td> <td></td> <td></td> </tr> <tr> <td>Tau</td> <td>a</td> <td>2.83627E-6</td> <td>6.42624E-7</td> </tr> <tr> <td>Tau</td> <td>b</td> <td>9.71168</td> <td>6.48692</td> </tr> </tbody> </table> | Model                                                                            | Exp2PMod1         |            |  | Equation | $y = a \cdot \exp(b/x)$                   |  |  | Reduced Chi-Sqr | 6.34601E-13 |  |  | Adj. R-Square | 0.98277 |  |  | Tau | a       | 1.38022E-7 | 6.90144E-8 | Tau | b       | 19.23112 | 1.86296 | Model                                                                                                                                                                                                                                                   | Exp2PMod1 |            |            | Equation | $y = a \cdot \exp(b/x)$ |          |         | Reduced Chi-Sqr | 2.30564E-10 |      |   | Adj. R-Square                                                                                                                                                                                                                                                                                                                                                             | 0.97753 |  |  | Tau | a | 2.83627E-6 | 6.42624E-7 | Tau | b | 9.71168 | 6.48692 | <p><b>Orbach</b></p> $\tau = \tau_0 \cdot \exp\{\Delta E/kT\}$ <p><math>T = 3.6-4</math> K<br/> <math>\Delta E/k = 19 \pm 2</math> K<br/> <math>\tau_0 = 1.4 \cdot 10^{-7} \pm 7 \cdot 10^{-8}</math> s<br/> <math>R^2 = 0.98277</math> (red line)</p> <p style="text-align: center;"><b>Meaningless fit!!!</b></p> <p><math>T = 2-4</math> K<br/> <math>\Delta E/k = 9.7 \pm 0.5</math> K<br/> <math>\tau_0 = 2.8 \cdot 10^{-6} \pm 6 \cdot 10^{-7}</math> s<br/> <math>R^2 = 0.97753</math> (blue line)</p> <p style="text-align: center;"><b>Meaningless fit!!!</b></p> |
| Model                                                                                                                                                                                                                                                                                                                                                                                                                                                                                                                                                                                                                                                                                                                                                                                                                                                                                                                                                                                                                                                                                                                                                                                                                                                                       | Exp2PMod1                                                                        |                   |            |  |          |                                           |  |  |                 |             |  |  |               |         |  |  |     |         |            |            |     |         |          |         |                                                                                                                                                                                                                                                         |           |            |            |          |                         |          |         |                 |             |      |   |                                                                                                                                                                                                                                                                                                                                                                           |         |  |  |     |   |            |            |     |   |         |         |                                                                                                                                                                                                                                                                                                                                                                                                                                                                                                                                                                            |
| Equation                                                                                                                                                                                                                                                                                                                                                                                                                                                                                                                                                                                                                                                                                                                                                                                                                                                                                                                                                                                                                                                                                                                                                                                                                                                                    | $y = a \cdot \exp(b/x)$                                                          |                   |            |  |          |                                           |  |  |                 |             |  |  |               |         |  |  |     |         |            |            |     |         |          |         |                                                                                                                                                                                                                                                         |           |            |            |          |                         |          |         |                 |             |      |   |                                                                                                                                                                                                                                                                                                                                                                           |         |  |  |     |   |            |            |     |   |         |         |                                                                                                                                                                                                                                                                                                                                                                                                                                                                                                                                                                            |
| Reduced Chi-Sqr                                                                                                                                                                                                                                                                                                                                                                                                                                                                                                                                                                                                                                                                                                                                                                                                                                                                                                                                                                                                                                                                                                                                                                                                                                                             | 6.34601E-13                                                                      |                   |            |  |          |                                           |  |  |                 |             |  |  |               |         |  |  |     |         |            |            |     |         |          |         |                                                                                                                                                                                                                                                         |           |            |            |          |                         |          |         |                 |             |      |   |                                                                                                                                                                                                                                                                                                                                                                           |         |  |  |     |   |            |            |     |   |         |         |                                                                                                                                                                                                                                                                                                                                                                                                                                                                                                                                                                            |
| Adj. R-Square                                                                                                                                                                                                                                                                                                                                                                                                                                                                                                                                                                                                                                                                                                                                                                                                                                                                                                                                                                                                                                                                                                                                                                                                                                                               | 0.98277                                                                          |                   |            |  |          |                                           |  |  |                 |             |  |  |               |         |  |  |     |         |            |            |     |         |          |         |                                                                                                                                                                                                                                                         |           |            |            |          |                         |          |         |                 |             |      |   |                                                                                                                                                                                                                                                                                                                                                                           |         |  |  |     |   |            |            |     |   |         |         |                                                                                                                                                                                                                                                                                                                                                                                                                                                                                                                                                                            |
| Tau                                                                                                                                                                                                                                                                                                                                                                                                                                                                                                                                                                                                                                                                                                                                                                                                                                                                                                                                                                                                                                                                                                                                                                                                                                                                         | a                                                                                | 1.38022E-7        | 6.90144E-8 |  |          |                                           |  |  |                 |             |  |  |               |         |  |  |     |         |            |            |     |         |          |         |                                                                                                                                                                                                                                                         |           |            |            |          |                         |          |         |                 |             |      |   |                                                                                                                                                                                                                                                                                                                                                                           |         |  |  |     |   |            |            |     |   |         |         |                                                                                                                                                                                                                                                                                                                                                                                                                                                                                                                                                                            |
| Tau                                                                                                                                                                                                                                                                                                                                                                                                                                                                                                                                                                                                                                                                                                                                                                                                                                                                                                                                                                                                                                                                                                                                                                                                                                                                         | b                                                                                | 19.23112          | 1.86296    |  |          |                                           |  |  |                 |             |  |  |               |         |  |  |     |         |            |            |     |         |          |         |                                                                                                                                                                                                                                                         |           |            |            |          |                         |          |         |                 |             |      |   |                                                                                                                                                                                                                                                                                                                                                                           |         |  |  |     |   |            |            |     |   |         |         |                                                                                                                                                                                                                                                                                                                                                                                                                                                                                                                                                                            |
| Model                                                                                                                                                                                                                                                                                                                                                                                                                                                                                                                                                                                                                                                                                                                                                                                                                                                                                                                                                                                                                                                                                                                                                                                                                                                                       | Exp2PMod1                                                                        |                   |            |  |          |                                           |  |  |                 |             |  |  |               |         |  |  |     |         |            |            |     |         |          |         |                                                                                                                                                                                                                                                         |           |            |            |          |                         |          |         |                 |             |      |   |                                                                                                                                                                                                                                                                                                                                                                           |         |  |  |     |   |            |            |     |   |         |         |                                                                                                                                                                                                                                                                                                                                                                                                                                                                                                                                                                            |
| Equation                                                                                                                                                                                                                                                                                                                                                                                                                                                                                                                                                                                                                                                                                                                                                                                                                                                                                                                                                                                                                                                                                                                                                                                                                                                                    | $y = a \cdot \exp(b/x)$                                                          |                   |            |  |          |                                           |  |  |                 |             |  |  |               |         |  |  |     |         |            |            |     |         |          |         |                                                                                                                                                                                                                                                         |           |            |            |          |                         |          |         |                 |             |      |   |                                                                                                                                                                                                                                                                                                                                                                           |         |  |  |     |   |            |            |     |   |         |         |                                                                                                                                                                                                                                                                                                                                                                                                                                                                                                                                                                            |
| Reduced Chi-Sqr                                                                                                                                                                                                                                                                                                                                                                                                                                                                                                                                                                                                                                                                                                                                                                                                                                                                                                                                                                                                                                                                                                                                                                                                                                                             | 2.30564E-10                                                                      |                   |            |  |          |                                           |  |  |                 |             |  |  |               |         |  |  |     |         |            |            |     |         |          |         |                                                                                                                                                                                                                                                         |           |            |            |          |                         |          |         |                 |             |      |   |                                                                                                                                                                                                                                                                                                                                                                           |         |  |  |     |   |            |            |     |   |         |         |                                                                                                                                                                                                                                                                                                                                                                                                                                                                                                                                                                            |
| Adj. R-Square                                                                                                                                                                                                                                                                                                                                                                                                                                                                                                                                                                                                                                                                                                                                                                                                                                                                                                                                                                                                                                                                                                                                                                                                                                                               | 0.97753                                                                          |                   |            |  |          |                                           |  |  |                 |             |  |  |               |         |  |  |     |         |            |            |     |         |          |         |                                                                                                                                                                                                                                                         |           |            |            |          |                         |          |         |                 |             |      |   |                                                                                                                                                                                                                                                                                                                                                                           |         |  |  |     |   |            |            |     |   |         |         |                                                                                                                                                                                                                                                                                                                                                                                                                                                                                                                                                                            |
| Tau                                                                                                                                                                                                                                                                                                                                                                                                                                                                                                                                                                                                                                                                                                                                                                                                                                                                                                                                                                                                                                                                                                                                                                                                                                                                         | a                                                                                | 2.83627E-6        | 6.42624E-7 |  |          |                                           |  |  |                 |             |  |  |               |         |  |  |     |         |            |            |     |         |          |         |                                                                                                                                                                                                                                                         |           |            |            |          |                         |          |         |                 |             |      |   |                                                                                                                                                                                                                                                                                                                                                                           |         |  |  |     |   |            |            |     |   |         |         |                                                                                                                                                                                                                                                                                                                                                                                                                                                                                                                                                                            |
| Tau                                                                                                                                                                                                                                                                                                                                                                                                                                                                                                                                                                                                                                                                                                                                                                                                                                                                                                                                                                                                                                                                                                                                                                                                                                                                         | b                                                                                | 9.71168           | 6.48692    |  |          |                                           |  |  |                 |             |  |  |               |         |  |  |     |         |            |            |     |         |          |         |                                                                                                                                                                                                                                                         |           |            |            |          |                         |          |         |                 |             |      |   |                                                                                                                                                                                                                                                                                                                                                                           |         |  |  |     |   |            |            |     |   |         |         |                                                                                                                                                                                                                                                                                                                                                                                                                                                                                                                                                                            |
| <p style="text-align: center;"><math>H_{DC} = 1000</math> Oe</p>  <table border="1" data-bbox="470 1086 718 1265"> <thead> <tr> <th>Model</th> <th>Orbach_QTM (User)</th> <th></th> <th></th> </tr> </thead> <tbody> <tr> <td>Equation</td> <td><math>1/(\tau_0 \cdot \exp(-\Delta E/kT) + B)</math></td> <td></td> <td></td> </tr> <tr> <td>Reduced Chi-Sqr</td> <td>1.10485E-10</td> <td></td> <td></td> </tr> <tr> <td>Adj. R-Square</td> <td>0.98923</td> <td></td> <td></td> </tr> <tr> <td>Tau</td> <td>B1</td> <td>1670.42533</td> <td>296.67976</td> </tr> <tr> <td>Tau</td> <td>B2</td> <td>0</td> <td>0</td> </tr> <tr> <td>Tau</td> <td>tau0</td> <td>6.45534E-7</td> <td>3.14902E-7</td> </tr> <tr> <td>Tau</td> <td>Ukb</td> <td>14.32624</td> <td>1.38148</td> </tr> <tr> <td>Tau</td> <td>H</td> <td>1000</td> <td>0</td> </tr> </tbody> </table>                                                                                                                                                                                                                                                                                                                          | Model                                                                            | Orbach_QTM (User) |            |  | Equation | $1/(\tau_0 \cdot \exp(-\Delta E/kT) + B)$ |  |  | Reduced Chi-Sqr | 1.10485E-10 |  |  | Adj. R-Square | 0.98923 |  |  | Tau | B1      | 1670.42533 | 296.67976  | Tau | B2      | 0        | 0       | Tau                                                                                                                                                                                                                                                     | tau0      | 6.45534E-7 | 3.14902E-7 | Tau      | Ukb                     | 14.32624 | 1.38148 | Tau             | H           | 1000 | 0 | <p><b>Orbach+QTM</b></p> $\tau^{-1} = \tau_0^{-1} \cdot \exp\{-\Delta E/kT\} + B$ <p><math>T = 2-4</math> K<br/> <math>\Delta E/k = 14 \pm 1</math> K<br/> <math>\tau_0 = 6 \cdot 10^{-7} \pm 3 \cdot 10^{-7}</math> s<br/> <math>B = 1670 \pm 300</math> s<sup>-1</sup><br/> <math>R^2 = 0.98923</math></p> <p style="text-align: center;"><b>Meaningless fit!!!</b></p> |         |  |  |     |   |            |            |     |   |         |         |                                                                                                                                                                                                                                                                                                                                                                                                                                                                                                                                                                            |
| Model                                                                                                                                                                                                                                                                                                                                                                                                                                                                                                                                                                                                                                                                                                                                                                                                                                                                                                                                                                                                                                                                                                                                                                                                                                                                       | Orbach_QTM (User)                                                                |                   |            |  |          |                                           |  |  |                 |             |  |  |               |         |  |  |     |         |            |            |     |         |          |         |                                                                                                                                                                                                                                                         |           |            |            |          |                         |          |         |                 |             |      |   |                                                                                                                                                                                                                                                                                                                                                                           |         |  |  |     |   |            |            |     |   |         |         |                                                                                                                                                                                                                                                                                                                                                                                                                                                                                                                                                                            |
| Equation                                                                                                                                                                                                                                                                                                                                                                                                                                                                                                                                                                                                                                                                                                                                                                                                                                                                                                                                                                                                                                                                                                                                                                                                                                                                    | $1/(\tau_0 \cdot \exp(-\Delta E/kT) + B)$                                        |                   |            |  |          |                                           |  |  |                 |             |  |  |               |         |  |  |     |         |            |            |     |         |          |         |                                                                                                                                                                                                                                                         |           |            |            |          |                         |          |         |                 |             |      |   |                                                                                                                                                                                                                                                                                                                                                                           |         |  |  |     |   |            |            |     |   |         |         |                                                                                                                                                                                                                                                                                                                                                                                                                                                                                                                                                                            |
| Reduced Chi-Sqr                                                                                                                                                                                                                                                                                                                                                                                                                                                                                                                                                                                                                                                                                                                                                                                                                                                                                                                                                                                                                                                                                                                                                                                                                                                             | 1.10485E-10                                                                      |                   |            |  |          |                                           |  |  |                 |             |  |  |               |         |  |  |     |         |            |            |     |         |          |         |                                                                                                                                                                                                                                                         |           |            |            |          |                         |          |         |                 |             |      |   |                                                                                                                                                                                                                                                                                                                                                                           |         |  |  |     |   |            |            |     |   |         |         |                                                                                                                                                                                                                                                                                                                                                                                                                                                                                                                                                                            |
| Adj. R-Square                                                                                                                                                                                                                                                                                                                                                                                                                                                                                                                                                                                                                                                                                                                                                                                                                                                                                                                                                                                                                                                                                                                                                                                                                                                               | 0.98923                                                                          |                   |            |  |          |                                           |  |  |                 |             |  |  |               |         |  |  |     |         |            |            |     |         |          |         |                                                                                                                                                                                                                                                         |           |            |            |          |                         |          |         |                 |             |      |   |                                                                                                                                                                                                                                                                                                                                                                           |         |  |  |     |   |            |            |     |   |         |         |                                                                                                                                                                                                                                                                                                                                                                                                                                                                                                                                                                            |
| Tau                                                                                                                                                                                                                                                                                                                                                                                                                                                                                                                                                                                                                                                                                                                                                                                                                                                                                                                                                                                                                                                                                                                                                                                                                                                                         | B1                                                                               | 1670.42533        | 296.67976  |  |          |                                           |  |  |                 |             |  |  |               |         |  |  |     |         |            |            |     |         |          |         |                                                                                                                                                                                                                                                         |           |            |            |          |                         |          |         |                 |             |      |   |                                                                                                                                                                                                                                                                                                                                                                           |         |  |  |     |   |            |            |     |   |         |         |                                                                                                                                                                                                                                                                                                                                                                                                                                                                                                                                                                            |
| Tau                                                                                                                                                                                                                                                                                                                                                                                                                                                                                                                                                                                                                                                                                                                                                                                                                                                                                                                                                                                                                                                                                                                                                                                                                                                                         | B2                                                                               | 0                 | 0          |  |          |                                           |  |  |                 |             |  |  |               |         |  |  |     |         |            |            |     |         |          |         |                                                                                                                                                                                                                                                         |           |            |            |          |                         |          |         |                 |             |      |   |                                                                                                                                                                                                                                                                                                                                                                           |         |  |  |     |   |            |            |     |   |         |         |                                                                                                                                                                                                                                                                                                                                                                                                                                                                                                                                                                            |
| Tau                                                                                                                                                                                                                                                                                                                                                                                                                                                                                                                                                                                                                                                                                                                                                                                                                                                                                                                                                                                                                                                                                                                                                                                                                                                                         | tau0                                                                             | 6.45534E-7        | 3.14902E-7 |  |          |                                           |  |  |                 |             |  |  |               |         |  |  |     |         |            |            |     |         |          |         |                                                                                                                                                                                                                                                         |           |            |            |          |                         |          |         |                 |             |      |   |                                                                                                                                                                                                                                                                                                                                                                           |         |  |  |     |   |            |            |     |   |         |         |                                                                                                                                                                                                                                                                                                                                                                                                                                                                                                                                                                            |
| Tau                                                                                                                                                                                                                                                                                                                                                                                                                                                                                                                                                                                                                                                                                                                                                                                                                                                                                                                                                                                                                                                                                                                                                                                                                                                                         | Ukb                                                                              | 14.32624          | 1.38148    |  |          |                                           |  |  |                 |             |  |  |               |         |  |  |     |         |            |            |     |         |          |         |                                                                                                                                                                                                                                                         |           |            |            |          |                         |          |         |                 |             |      |   |                                                                                                                                                                                                                                                                                                                                                                           |         |  |  |     |   |            |            |     |   |         |         |                                                                                                                                                                                                                                                                                                                                                                                                                                                                                                                                                                            |
| Tau                                                                                                                                                                                                                                                                                                                                                                                                                                                                                                                                                                                                                                                                                                                                                                                                                                                                                                                                                                                                                                                                                                                                                                                                                                                                         | H                                                                                | 1000              | 0          |  |          |                                           |  |  |                 |             |  |  |               |         |  |  |     |         |            |            |     |         |          |         |                                                                                                                                                                                                                                                         |           |            |            |          |                         |          |         |                 |             |      |   |                                                                                                                                                                                                                                                                                                                                                                           |         |  |  |     |   |            |            |     |   |         |         |                                                                                                                                                                                                                                                                                                                                                                                                                                                                                                                                                                            |
| <p style="text-align: center;"><math>H_{DC} = 1000</math> Oe</p>  <table border="1" data-bbox="470 1624 710 1736"> <thead> <tr> <th>Model</th> <th>Raman (User)</th> <th></th> <th></th> </tr> </thead> <tbody> <tr> <td>Equation</td> <td><math>1/(C_{Raman} \cdot T^{n_{Raman}})</math></td> <td></td> <td></td> </tr> <tr> <td>Reduced Chi-Sqr</td> <td>9.28131E-11</td> <td></td> <td></td> </tr> <tr> <td>Adj. R-Square</td> <td>0.99096</td> <td></td> <td></td> </tr> <tr> <td>Tau</td> <td>C_raman</td> <td>178.42372</td> <td>20.20558</td> </tr> <tr> <td>Tau</td> <td>n_raman</td> <td>3.97623</td> <td>0.13992</td> </tr> </tbody> </table>                                                                                                                                                                                                                                                                                                                                                                                                                                                                                                                                  | Model                                                                            | Raman (User)      |            |  | Equation | $1/(C_{Raman} \cdot T^{n_{Raman}})$       |  |  | Reduced Chi-Sqr | 9.28131E-11 |  |  | Adj. R-Square | 0.99096 |  |  | Tau | C_raman | 178.42372  | 20.20558   | Tau | n_raman | 3.97623  | 0.13992 | <p><b>Raman</b></p> $\tau^{-1} = C_{Raman} T^{n_{Raman}}$ <p><math>T = 2-4</math> K<br/> <math>C_{Raman} = 178 \pm 20</math> s<sup>-1</sup>K<sup>-n<sub>Raman</sub></sup><br/> <math>n_{Raman} = 4.0 \pm 0.1</math><br/> <math>R^2 = 0.99096</math></p> |           |            |            |          |                         |          |         |                 |             |      |   |                                                                                                                                                                                                                                                                                                                                                                           |         |  |  |     |   |            |            |     |   |         |         |                                                                                                                                                                                                                                                                                                                                                                                                                                                                                                                                                                            |
| Model                                                                                                                                                                                                                                                                                                                                                                                                                                                                                                                                                                                                                                                                                                                                                                                                                                                                                                                                                                                                                                                                                                                                                                                                                                                                       | Raman (User)                                                                     |                   |            |  |          |                                           |  |  |                 |             |  |  |               |         |  |  |     |         |            |            |     |         |          |         |                                                                                                                                                                                                                                                         |           |            |            |          |                         |          |         |                 |             |      |   |                                                                                                                                                                                                                                                                                                                                                                           |         |  |  |     |   |            |            |     |   |         |         |                                                                                                                                                                                                                                                                                                                                                                                                                                                                                                                                                                            |
| Equation                                                                                                                                                                                                                                                                                                                                                                                                                                                                                                                                                                                                                                                                                                                                                                                                                                                                                                                                                                                                                                                                                                                                                                                                                                                                    | $1/(C_{Raman} \cdot T^{n_{Raman}})$                                              |                   |            |  |          |                                           |  |  |                 |             |  |  |               |         |  |  |     |         |            |            |     |         |          |         |                                                                                                                                                                                                                                                         |           |            |            |          |                         |          |         |                 |             |      |   |                                                                                                                                                                                                                                                                                                                                                                           |         |  |  |     |   |            |            |     |   |         |         |                                                                                                                                                                                                                                                                                                                                                                                                                                                                                                                                                                            |
| Reduced Chi-Sqr                                                                                                                                                                                                                                                                                                                                                                                                                                                                                                                                                                                                                                                                                                                                                                                                                                                                                                                                                                                                                                                                                                                                                                                                                                                             | 9.28131E-11                                                                      |                   |            |  |          |                                           |  |  |                 |             |  |  |               |         |  |  |     |         |            |            |     |         |          |         |                                                                                                                                                                                                                                                         |           |            |            |          |                         |          |         |                 |             |      |   |                                                                                                                                                                                                                                                                                                                                                                           |         |  |  |     |   |            |            |     |   |         |         |                                                                                                                                                                                                                                                                                                                                                                                                                                                                                                                                                                            |
| Adj. R-Square                                                                                                                                                                                                                                                                                                                                                                                                                                                                                                                                                                                                                                                                                                                                                                                                                                                                                                                                                                                                                                                                                                                                                                                                                                                               | 0.99096                                                                          |                   |            |  |          |                                           |  |  |                 |             |  |  |               |         |  |  |     |         |            |            |     |         |          |         |                                                                                                                                                                                                                                                         |           |            |            |          |                         |          |         |                 |             |      |   |                                                                                                                                                                                                                                                                                                                                                                           |         |  |  |     |   |            |            |     |   |         |         |                                                                                                                                                                                                                                                                                                                                                                                                                                                                                                                                                                            |
| Tau                                                                                                                                                                                                                                                                                                                                                                                                                                                                                                                                                                                                                                                                                                                                                                                                                                                                                                                                                                                                                                                                                                                                                                                                                                                                         | C_raman                                                                          | 178.42372         | 20.20558   |  |          |                                           |  |  |                 |             |  |  |               |         |  |  |     |         |            |            |     |         |          |         |                                                                                                                                                                                                                                                         |           |            |            |          |                         |          |         |                 |             |      |   |                                                                                                                                                                                                                                                                                                                                                                           |         |  |  |     |   |            |            |     |   |         |         |                                                                                                                                                                                                                                                                                                                                                                                                                                                                                                                                                                            |
| Tau                                                                                                                                                                                                                                                                                                                                                                                                                                                                                                                                                                                                                                                                                                                                                                                                                                                                                                                                                                                                                                                                                                                                                                                                                                                                         | n_raman                                                                          | 3.97623           | 0.13992    |  |          |                                           |  |  |                 |             |  |  |               |         |  |  |     |         |            |            |     |         |          |         |                                                                                                                                                                                                                                                         |           |            |            |          |                         |          |         |                 |             |      |   |                                                                                                                                                                                                                                                                                                                                                                           |         |  |  |     |   |            |            |     |   |         |         |                                                                                                                                                                                                                                                                                                                                                                                                                                                                                                                                                                            |

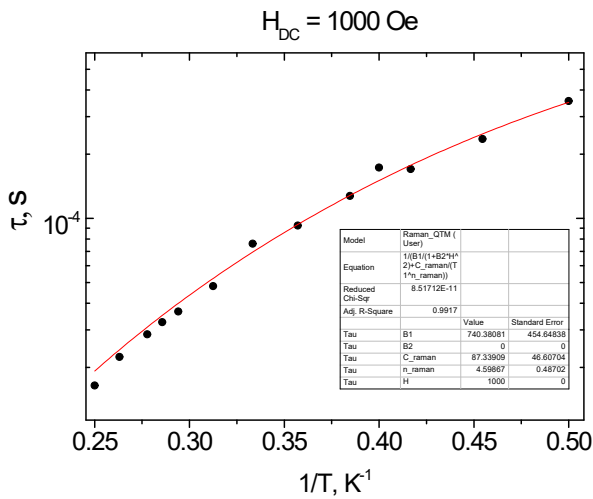

### Raman+ QTM

$$\tau^{-1} = C_{\text{Raman}} T^{n_{\text{Raman}}} + B$$

$$T = 2-4 \text{ K}$$

$$C_{\text{Raman}} = 87 \pm 47 \text{ s}^{-1} \text{K}^{-n_{\text{Raman}}}$$

$$n_{\text{Raman}} = 4.6 \pm 0.5$$

$$B = 740 \pm 455 \text{ s}^{-1}$$

$$R^2 = 0.9917$$

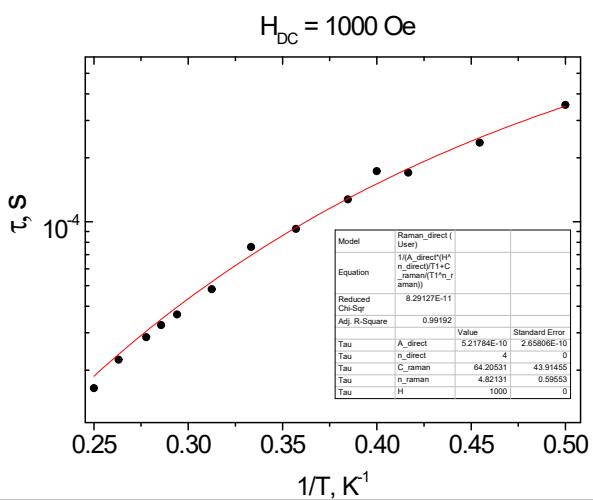

### Raman+Direct

$$\tau^{-1} = C_{\text{Raman}} T^{n_{\text{Raman}}} + A_{\text{direct}} T^4$$

$$T = 2-4 \text{ K}$$

$$C_{\text{Raman}} = 64 \pm 44 \text{ s}^{-1} \text{K}^{-n_{\text{Raman}}}$$

$$n_{\text{Raman}} = 4.8 \pm 0.6$$

$$A_{\text{direct}} = 5 \cdot 10^{-10} \pm 3 \cdot 10^{-10} \text{ K}^{-1} \text{Oe}^{-4} \text{ s}^{-1}$$

$$R^2 = 0.99192$$

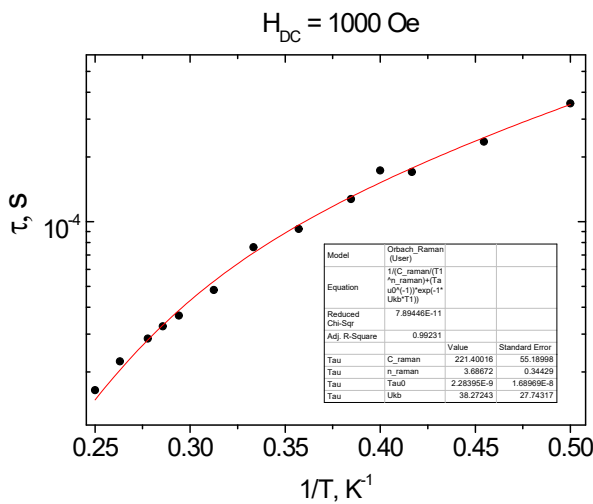

### Orbach+Raman

$$\tau^{-1} = \tau_0^{-1} \cdot \exp\left\{-\frac{\Delta E}{kT}\right\} + C_{\text{Raman}} T^{n_{\text{Raman}}}$$

$$T = 2-4 \text{ K}$$

$$\Delta E/k = 38 \pm 28 \text{ K}$$

$$\tau_0 = 2 \cdot 10^{-9} \pm 1.7 \cdot 10^{-8} \text{ s}$$

$$C_{\text{Raman}} = 221 \pm 55 \text{ s}^{-1} \text{K}^{-n_{\text{Raman}}}$$

$$n_{\text{Raman}} = 3.7 \pm 0.3 \text{ (if } n_{\text{Raman}} \text{ is not fixed, then it tends to be 0)}$$

$$R^2 = 0.99231$$

**Over-parametrization!!!**

$$\tau^{-1} = \tau_0^{-1} \cdot \exp\left\{-\frac{\Delta E}{kT}\right\} + C_{\text{Raman}} T^{n_{\text{Raman}}}$$

$$T = 2-4 \text{ K}$$

$$\Delta E/k = 31 \text{ K (fixed)}$$

$$\tau_0 = 1.6 \cdot 10^{-8} \pm 9 \cdot 10^{-9} \text{ s}$$

$$C_{\text{Raman}} = 238 \pm 42 \text{ s}^{-1} \text{K}^{-n_{\text{Raman}}}$$

$$n_{\text{Raman}} = 3.6 \pm 0.2$$

$$R^2 = 0.99293$$

$H_{DC} = 1000 \text{ Oe}$

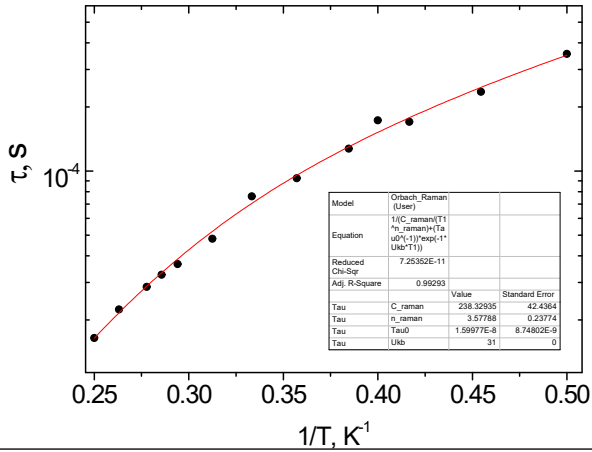

**Meaningless fit!!!**

$H_{DC} = 1000 \text{ Oe}$

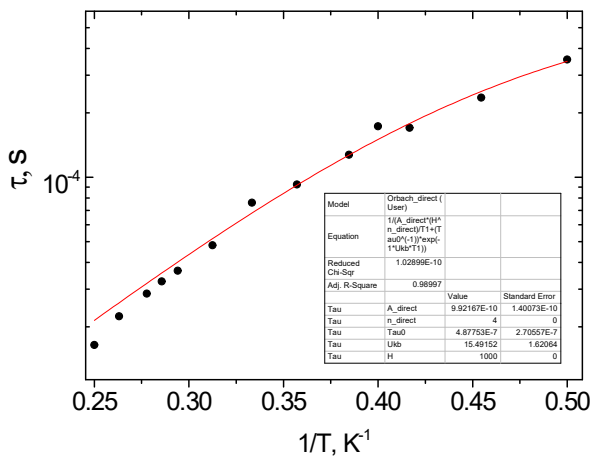

**Orbach+Direct**

$$\tau^{-1} = \tau_0^{-1} \cdot \exp\{-\Delta E/kT\} + A_{direct} T H^4$$

$$T = 2-4 \text{ K}$$

$$\Delta E/k = 15 \pm 2 \text{ K}$$

$$\tau_0 = 5 \cdot 10^{-7} \pm 3 \cdot 10^{-7} \text{ s}$$

$$A_{direct} = 1 \cdot 10^{-9} \pm 1 \cdot 10^{-10} \text{ K}^{-1} \text{Oe}^{-4} \text{s}^{-1}$$

$$R^2 = 0.98997$$

**Meaningless fit!!!**

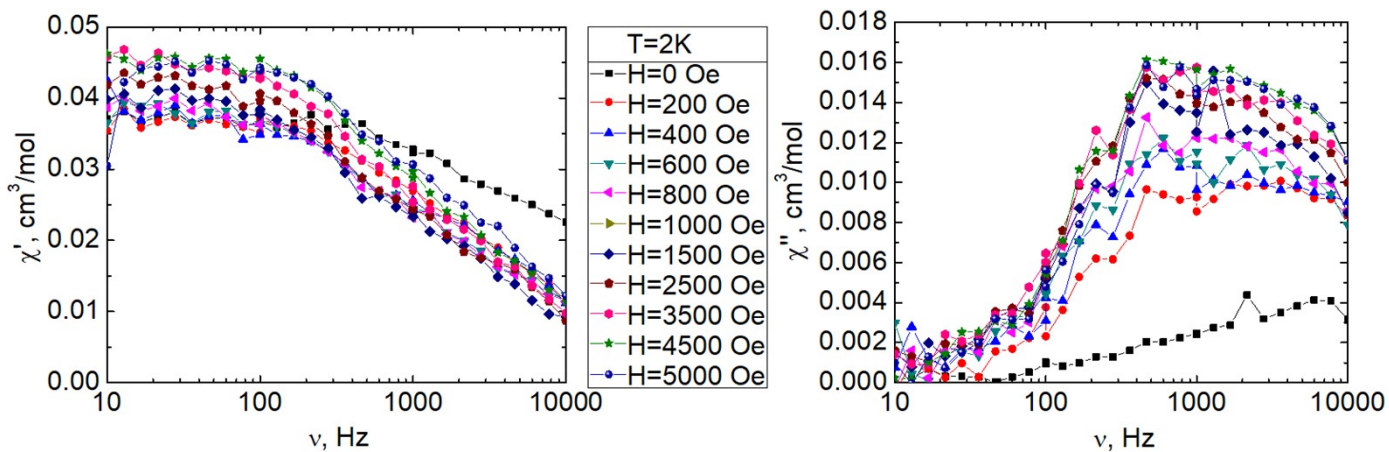

**Fig. S10.** Frequency dependencies of real (left) and imaginary (right) components of dynamic magnetic susceptibility of **Nd@Y** sample at 2 K in various DC magnetic fields. Solid lines are visual guides.

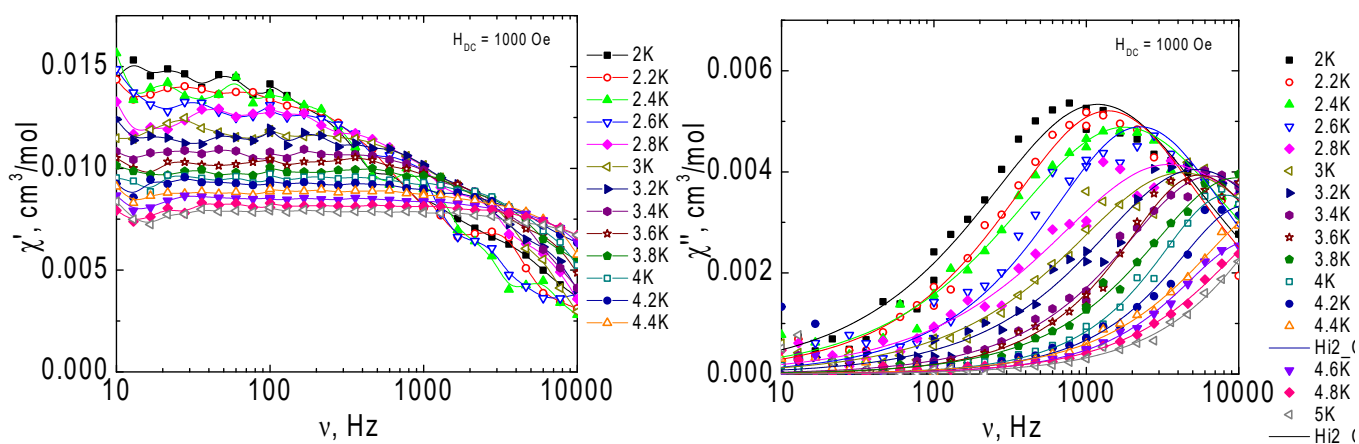

**Fig. S11.** Frequency dependencies of real (left) and imaginary (right) components of magnetic susceptibility for **Nd@Y** sample in 1000 Oe DC magnetic field. Solid lines on the left section are visual guides. Solid lines on the right section represent best fits by the generalized Debye model.

**Table S9.** Various approximations of  $\tau$  vs.  $1/T$  dependency for Nd@Y sample under a DC field of 1000 Oe.

| Dependence of the relaxation time $\tau$ on the reciprocal temperature for Tb complex <b>1</b> ( $H = 1$ kOe, $T = 2-3.2$ K).                                                                                                                                                                                                                                                                                                                                                                                                                                                                                                                                                                                                                                                                                                                                                                                                                                                                                     | Fit function, temperature range, and the best-fit parameters |                |                |     |         |           |     |          |         |     |       |            |                                                                                                                                                                                                                                                                                                                                                                                            |       |                |     |      |            |     |          |         |     |       |         |                                                                                                                                                                                                                                                                                                                                                                                                                                                                                                                                                                                                    |
|-------------------------------------------------------------------------------------------------------------------------------------------------------------------------------------------------------------------------------------------------------------------------------------------------------------------------------------------------------------------------------------------------------------------------------------------------------------------------------------------------------------------------------------------------------------------------------------------------------------------------------------------------------------------------------------------------------------------------------------------------------------------------------------------------------------------------------------------------------------------------------------------------------------------------------------------------------------------------------------------------------------------|--------------------------------------------------------------|----------------|----------------|-----|---------|-----------|-----|----------|---------|-----|-------|------------|--------------------------------------------------------------------------------------------------------------------------------------------------------------------------------------------------------------------------------------------------------------------------------------------------------------------------------------------------------------------------------------------|-------|----------------|-----|------|------------|-----|----------|---------|-----|-------|---------|----------------------------------------------------------------------------------------------------------------------------------------------------------------------------------------------------------------------------------------------------------------------------------------------------------------------------------------------------------------------------------------------------------------------------------------------------------------------------------------------------------------------------------------------------------------------------------------------------|
| <p style="text-align: center;"><math>H_{DC} = 1000</math> Oe</p> <p>Model: Orbach (User)<br/>Equation: <math>\tau = \tau_0 \cdot \exp\{\Delta E/kT\}</math><br/>Reduced Chi-Sqr: 4.5533E-13<br/>Adj. R-Square: 0.99221</p> <table border="1"> <thead> <tr> <th>Parameter</th> <th>Value</th> <th>Standard Error</th> </tr> </thead> <tbody> <tr> <td>Tau</td> <td>tau0</td> <td>1.8552E-6</td> </tr> <tr> <td>Tau</td> <td>DE_div_k</td> <td>8.9378</td> </tr> <tr> <td>Tau</td> <td>const</td> <td>0</td> </tr> </tbody> </table> <p>Model: Orbach (User)<br/>Equation: <math>\tau = \tau_0 \cdot \exp\{\Delta E/kT\} + B</math><br/>Reduced Chi-Sqr: 9.93641E-11<br/>Adj. R-Square: 0.93713</p> <table border="1"> <thead> <tr> <th>Parameter</th> <th>Value</th> <th>Standard Error</th> </tr> </thead> <tbody> <tr> <td>Tau</td> <td>tau0</td> <td>4.32979E-6</td> </tr> <tr> <td>Tau</td> <td>DE_div_k</td> <td>8.99249</td> </tr> <tr> <td>Tau</td> <td>const</td> <td>0.79131</td> </tr> </tbody> </table> | Parameter                                                    | Value          | Standard Error | Tau | tau0    | 1.8552E-6 | Tau | DE_div_k | 8.9378  | Tau | const | 0          | Parameter                                                                                                                                                                                                                                                                                                                                                                                  | Value | Standard Error | Tau | tau0 | 4.32979E-6 | Tau | DE_div_k | 8.99249 | Tau | const | 0.79131 | <p><b>Orbach</b><br/> <math>\tau = \tau_0 \cdot \exp\{\Delta E/kT\}</math><br/> <math>T = 2.8-3.2</math> K<br/> <math>\Delta E/k = 8.98 \pm 0.56</math> K<br/> <math>\tau_0 = 1.9 \cdot 10^{-6} \pm 4 \cdot 10^{-7}</math> s<br/> <math>R^2 = 0.9922</math> (red line)</p> <p style="text-align: center;"><b>Meaningless fit!!!</b></p> <p><math>T = 2-3.2</math> K<br/> <math>\Delta E/k = 7.0 \pm 0.8</math> K<br/> <math>\tau_0 = 4.3 \cdot 10^{-6} \pm 1.6 \cdot 10^{-6}</math> s<br/> <math>R^2 = 0.93713</math> (blue line)</p> <p style="text-align: center;"><b>Meaningless fit!!!</b></p> |
| Parameter                                                                                                                                                                                                                                                                                                                                                                                                                                                                                                                                                                                                                                                                                                                                                                                                                                                                                                                                                                                                         | Value                                                        | Standard Error |                |     |         |           |     |          |         |     |       |            |                                                                                                                                                                                                                                                                                                                                                                                            |       |                |     |      |            |     |          |         |     |       |         |                                                                                                                                                                                                                                                                                                                                                                                                                                                                                                                                                                                                    |
| Tau                                                                                                                                                                                                                                                                                                                                                                                                                                                                                                                                                                                                                                                                                                                                                                                                                                                                                                                                                                                                               | tau0                                                         | 1.8552E-6      |                |     |         |           |     |          |         |     |       |            |                                                                                                                                                                                                                                                                                                                                                                                            |       |                |     |      |            |     |          |         |     |       |         |                                                                                                                                                                                                                                                                                                                                                                                                                                                                                                                                                                                                    |
| Tau                                                                                                                                                                                                                                                                                                                                                                                                                                                                                                                                                                                                                                                                                                                                                                                                                                                                                                                                                                                                               | DE_div_k                                                     | 8.9378         |                |     |         |           |     |          |         |     |       |            |                                                                                                                                                                                                                                                                                                                                                                                            |       |                |     |      |            |     |          |         |     |       |         |                                                                                                                                                                                                                                                                                                                                                                                                                                                                                                                                                                                                    |
| Tau                                                                                                                                                                                                                                                                                                                                                                                                                                                                                                                                                                                                                                                                                                                                                                                                                                                                                                                                                                                                               | const                                                        | 0              |                |     |         |           |     |          |         |     |       |            |                                                                                                                                                                                                                                                                                                                                                                                            |       |                |     |      |            |     |          |         |     |       |         |                                                                                                                                                                                                                                                                                                                                                                                                                                                                                                                                                                                                    |
| Parameter                                                                                                                                                                                                                                                                                                                                                                                                                                                                                                                                                                                                                                                                                                                                                                                                                                                                                                                                                                                                         | Value                                                        | Standard Error |                |     |         |           |     |          |         |     |       |            |                                                                                                                                                                                                                                                                                                                                                                                            |       |                |     |      |            |     |          |         |     |       |         |                                                                                                                                                                                                                                                                                                                                                                                                                                                                                                                                                                                                    |
| Tau                                                                                                                                                                                                                                                                                                                                                                                                                                                                                                                                                                                                                                                                                                                                                                                                                                                                                                                                                                                                               | tau0                                                         | 4.32979E-6     |                |     |         |           |     |          |         |     |       |            |                                                                                                                                                                                                                                                                                                                                                                                            |       |                |     |      |            |     |          |         |     |       |         |                                                                                                                                                                                                                                                                                                                                                                                                                                                                                                                                                                                                    |
| Tau                                                                                                                                                                                                                                                                                                                                                                                                                                                                                                                                                                                                                                                                                                                                                                                                                                                                                                                                                                                                               | DE_div_k                                                     | 8.99249        |                |     |         |           |     |          |         |     |       |            |                                                                                                                                                                                                                                                                                                                                                                                            |       |                |     |      |            |     |          |         |     |       |         |                                                                                                                                                                                                                                                                                                                                                                                                                                                                                                                                                                                                    |
| Tau                                                                                                                                                                                                                                                                                                                                                                                                                                                                                                                                                                                                                                                                                                                                                                                                                                                                                                                                                                                                               | const                                                        | 0.79131        |                |     |         |           |     |          |         |     |       |            |                                                                                                                                                                                                                                                                                                                                                                                            |       |                |     |      |            |     |          |         |     |       |         |                                                                                                                                                                                                                                                                                                                                                                                                                                                                                                                                                                                                    |
| <p style="text-align: center;"><math>H_{DC} = 1000</math> Oe</p> <p>Model: Orbach (User)<br/>Equation: <math>\tau^{-1} = \tau_0^{-1} \cdot \exp\{-\Delta E/kT\} + B</math><br/>Reduced Chi-Sqr: 8.9594E-12<br/>Adj. R-Square: 0.99437</p> <table border="1"> <thead> <tr> <th>Parameter</th> <th>Value</th> <th>Standard Error</th> </tr> </thead> <tbody> <tr> <td>Tau</td> <td>tau0</td> <td>1.4439E-7</td> </tr> <tr> <td>Tau</td> <td>DE_div_k</td> <td>17.5572</td> </tr> <tr> <td>Tau</td> <td>const</td> <td>6326.83697</td> </tr> </tbody> </table>                                                                                                                                                                                                                                                                                                                                                                                                                                                       | Parameter                                                    | Value          | Standard Error | Tau | tau0    | 1.4439E-7 | Tau | DE_div_k | 17.5572 | Tau | const | 6326.83697 | <p><b>Orbach+QTM</b><br/> <math>\tau^{-1} = \tau_0^{-1} \cdot \exp\{-\Delta E/kT\} + B</math><br/> <math>T = 2-3.2</math> K<br/> <math>\Delta E/k = 17 \pm 2</math> K<br/> <math>\tau_0 = 1.4 \cdot 10^{-7} \pm 8 \cdot 10^{-8}</math> s<br/> <math>B = 6326 \pm 369</math> s<sup>-1</sup><br/> <math>R^2 = 0.9944</math></p> <p style="text-align: center;"><b>Meaningless fit!!!</b></p> |       |                |     |      |            |     |          |         |     |       |         |                                                                                                                                                                                                                                                                                                                                                                                                                                                                                                                                                                                                    |
| Parameter                                                                                                                                                                                                                                                                                                                                                                                                                                                                                                                                                                                                                                                                                                                                                                                                                                                                                                                                                                                                         | Value                                                        | Standard Error |                |     |         |           |     |          |         |     |       |            |                                                                                                                                                                                                                                                                                                                                                                                            |       |                |     |      |            |     |          |         |     |       |         |                                                                                                                                                                                                                                                                                                                                                                                                                                                                                                                                                                                                    |
| Tau                                                                                                                                                                                                                                                                                                                                                                                                                                                                                                                                                                                                                                                                                                                                                                                                                                                                                                                                                                                                               | tau0                                                         | 1.4439E-7      |                |     |         |           |     |          |         |     |       |            |                                                                                                                                                                                                                                                                                                                                                                                            |       |                |     |      |            |     |          |         |     |       |         |                                                                                                                                                                                                                                                                                                                                                                                                                                                                                                                                                                                                    |
| Tau                                                                                                                                                                                                                                                                                                                                                                                                                                                                                                                                                                                                                                                                                                                                                                                                                                                                                                                                                                                                               | DE_div_k                                                     | 17.5572        |                |     |         |           |     |          |         |     |       |            |                                                                                                                                                                                                                                                                                                                                                                                            |       |                |     |      |            |     |          |         |     |       |         |                                                                                                                                                                                                                                                                                                                                                                                                                                                                                                                                                                                                    |
| Tau                                                                                                                                                                                                                                                                                                                                                                                                                                                                                                                                                                                                                                                                                                                                                                                                                                                                                                                                                                                                               | const                                                        | 6326.83697     |                |     |         |           |     |          |         |     |       |            |                                                                                                                                                                                                                                                                                                                                                                                            |       |                |     |      |            |     |          |         |     |       |         |                                                                                                                                                                                                                                                                                                                                                                                                                                                                                                                                                                                                    |
| <p style="text-align: center;"><math>H_{DC} = 1000</math> Oe</p> <p>Model: Raman (User)<br/>Equation: <math>\tau^{-1} = C_{Raman} T^{n_{Raman}}</math><br/>Reduced Chi-Sqr: 4.83742E-11<br/>Adj. R-Square: 0.96314</p> <table border="1"> <thead> <tr> <th>Parameter</th> <th>Value</th> <th>Standard Error</th> </tr> </thead> <tbody> <tr> <td>Tau</td> <td>C_Raman</td> <td>909.36571</td> </tr> <tr> <td>Tau</td> <td>n_Raman</td> <td>2.96055</td> </tr> <tr> <td>Tau</td> <td>const</td> <td>0</td> </tr> </tbody> </table>                                                                                                                                                                                                                                                                                                                                                                                                                                                                                 | Parameter                                                    | Value          | Standard Error | Tau | C_Raman | 909.36571 | Tau | n_Raman  | 2.96055 | Tau | const | 0          | <p><b>Raman</b><br/> <math>\tau^{-1} = C_{Raman} T^{n_{Raman}}</math><br/> <math>T = 2-3.2</math> K<br/> <math>C_{Raman} = 909 \pm 200</math> s<sup>-1</sup> K<sup>-nRaman</sup><br/> <math>n_{Raman} = 2.96 \pm 0.26</math><br/> <math>R^2 = 0.96311</math></p> <p>Moderate <math>R^2</math></p>                                                                                          |       |                |     |      |            |     |          |         |     |       |         |                                                                                                                                                                                                                                                                                                                                                                                                                                                                                                                                                                                                    |
| Parameter                                                                                                                                                                                                                                                                                                                                                                                                                                                                                                                                                                                                                                                                                                                                                                                                                                                                                                                                                                                                         | Value                                                        | Standard Error |                |     |         |           |     |          |         |     |       |            |                                                                                                                                                                                                                                                                                                                                                                                            |       |                |     |      |            |     |          |         |     |       |         |                                                                                                                                                                                                                                                                                                                                                                                                                                                                                                                                                                                                    |
| Tau                                                                                                                                                                                                                                                                                                                                                                                                                                                                                                                                                                                                                                                                                                                                                                                                                                                                                                                                                                                                               | C_Raman                                                      | 909.36571      |                |     |         |           |     |          |         |     |       |            |                                                                                                                                                                                                                                                                                                                                                                                            |       |                |     |      |            |     |          |         |     |       |         |                                                                                                                                                                                                                                                                                                                                                                                                                                                                                                                                                                                                    |
| Tau                                                                                                                                                                                                                                                                                                                                                                                                                                                                                                                                                                                                                                                                                                                                                                                                                                                                                                                                                                                                               | n_Raman                                                      | 2.96055        |                |     |         |           |     |          |         |     |       |            |                                                                                                                                                                                                                                                                                                                                                                                            |       |                |     |      |            |     |          |         |     |       |         |                                                                                                                                                                                                                                                                                                                                                                                                                                                                                                                                                                                                    |
| Tau                                                                                                                                                                                                                                                                                                                                                                                                                                                                                                                                                                                                                                                                                                                                                                                                                                                                                                                                                                                                               | const                                                        | 0              |                |     |         |           |     |          |         |     |       |            |                                                                                                                                                                                                                                                                                                                                                                                            |       |                |     |      |            |     |          |         |     |       |         |                                                                                                                                                                                                                                                                                                                                                                                                                                                                                                                                                                                                    |

$H_{DC} = 1000 \text{ Oe}$

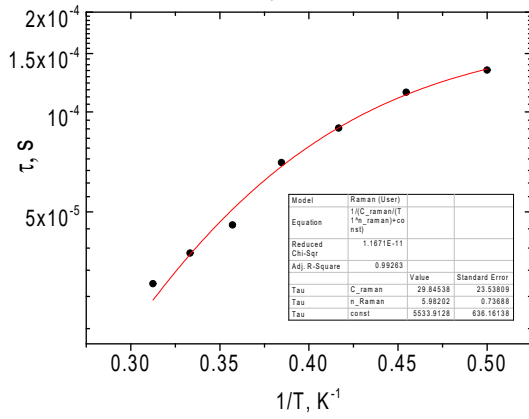

### Raman+ QTM

$$\tau^{-1} = C_{\text{Raman}} T^{n_{\text{Raman}}} + B$$

$$T = 2-3.2\text{K}$$

$$C_{\text{Raman}} = 30 \pm 24 \text{ s}^{-1} \text{K}^{-n_{\text{Raman}}}$$

$$n_{\text{Raman}} = 6.0 \pm 0.7$$

$$B = 5533 \pm 636 \text{ s}^{-1}$$

$$R^2 = 0.99263$$

$H_{DC} = 1000 \text{ Oe}$

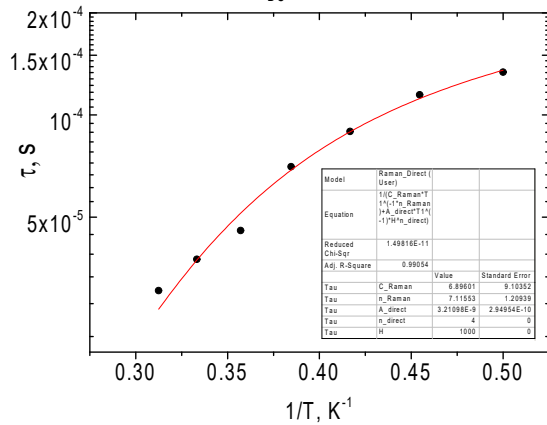

### Raman+Direct

$$\tau^{-1} = C_{\text{Raman}} T^{n_{\text{Raman}}} + A_{\text{direct}} T^H$$

$$T = 2-3.2\text{K}$$

$$C_{\text{Raman}} = 6.8 \pm 9 \text{ s}^{-1} \text{K}^{-n_{\text{Raman}}}$$

$$n_{\text{Raman}} = 7.1 \pm 1.2$$

$$A_{\text{direct}} = 3 \cdot 10^{-9} \pm 3 \cdot 10^{-10} \text{ K}^{-1} \text{Oe}^{-4} \text{ s}^{-1}$$

$$R^2 = 0.99054$$

**Meaningless fit!!!**

**Table S10.** CASSCF computed energy levels (the composition of the effective  $g'$ - tensor (assuming a pseudospin  $S = \frac{1}{2}$ ) and major (>10%) components of the wave function for each mJ state of the lowest atomic multiplet  $J=9/2$  of  $Nd^{3+}$ . KDs involved in magnetic relaxation are specified.

| <b>KD</b> | <b>E,K</b> | <b><math>g_x</math></b> | <b><math>g_y</math></b> | <b><math>g_z</math></b> | <b>Wavefunction decomposition, %</b>                                                        |
|-----------|------------|-------------------------|-------------------------|-------------------------|---------------------------------------------------------------------------------------------|
| 1         | 0.0        | 0.366                   | 1.941                   | 4.164                   | $52 \pm 9/2\rangle 26 \pm 5/2\rangle 12 \pm 1/2\rangle$                                     |
| 2         | 141.7      | 3.089                   | 1.734                   | 0.345                   | $15 \pm 9/2\rangle 29 \pm 7/2\rangle 10 \pm 5/2\rangle 27 \pm 3/2\rangle 20 \pm 1/2\rangle$ |
| 3         | 261.9      | 0.447                   | 1.195                   | 4.794                   | $18 \pm 9/2\rangle 24 \pm 7/2\rangle 14 \pm 5/2\rangle 10 \pm 3/2\rangle 35 \pm 1/2\rangle$ |
| 4         | 397.5      | 3.152                   | 2.526                   | 0.513                   | $28 \pm 7/2\rangle 41 \pm 3/2\rangle 24 \pm 1/2\rangle$                                     |
| 5         | 490.1      | 0.584                   | 2.011                   | 3.651                   | $13 \pm 9/2\rangle 15 \pm 7/2\rangle 46 \pm 5/2\rangle 16 \pm 3/2\rangle 10 \pm 1/2\rangle$ |

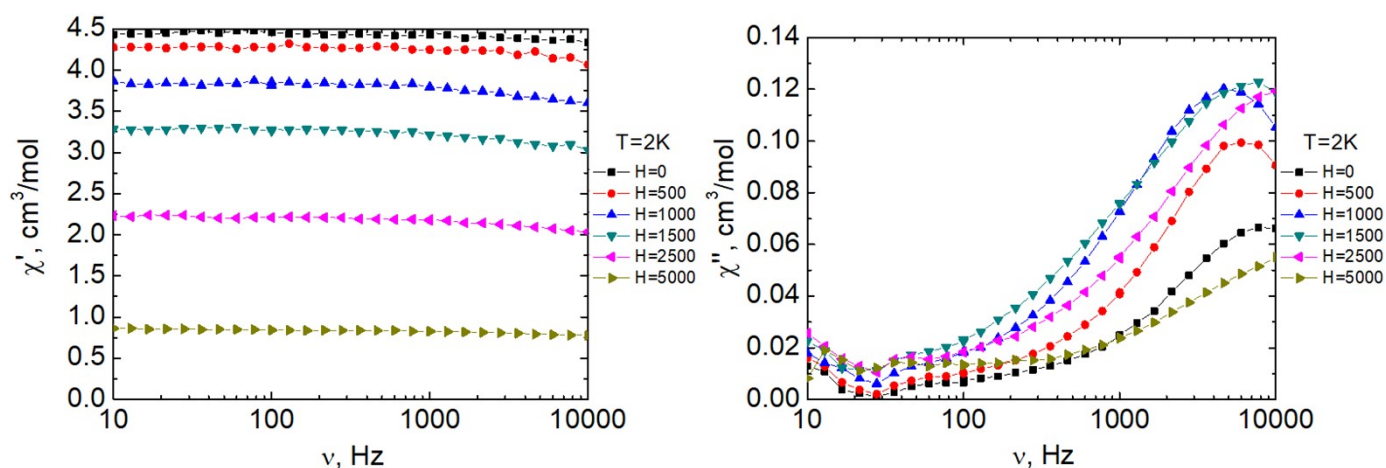

**Fig. S12.** Frequency dependencies of the in-phase ( $\chi'$ , left) and out-of-phase ( $\chi''$ , right) components of the dynamic magnetic susceptibility of complex **Ho** measured at  $T=2\text{K}$  under various DC magnetic fields. Solid lines are visual guides.

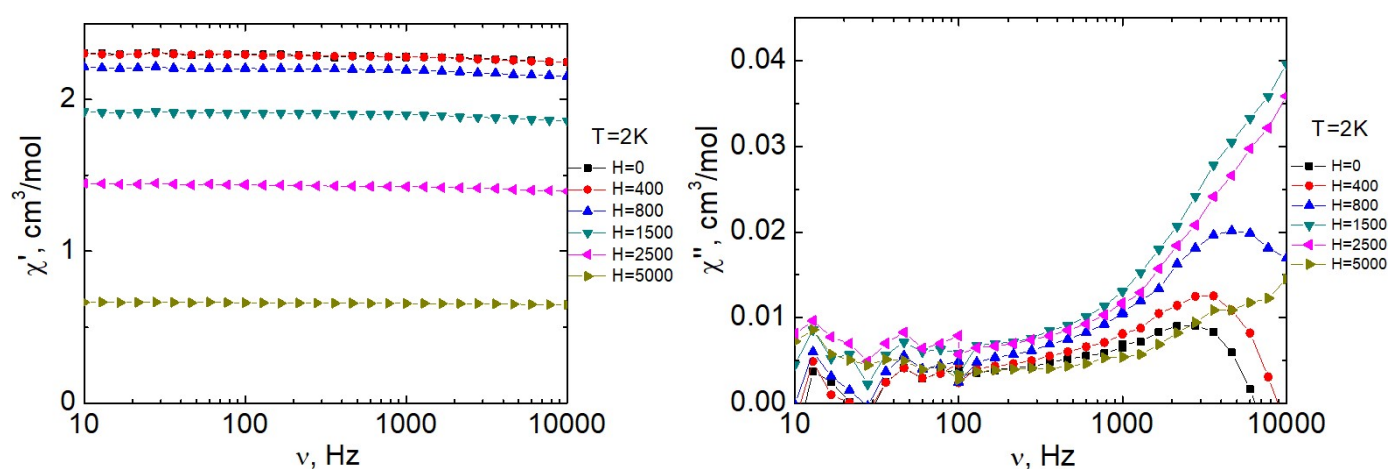

**Fig. S13.** Frequency dependencies of the in-phase ( $\chi'$ , left) and out-of-phase ( $\chi''$ , right) components of the dynamic magnetic susceptibility of complex **Tm** measured at  $T=2\text{K}$  under various DC magnetic fields. Solid lines are visual guides.
